# Supplementary material
Source: HighWire-hosted journal article supplement (https://bmjopen.bmj.com/content/13/3/e059937)
Supplement: inline-supplementary-material-4 [file inline-supplementary-material-4.pdf]

### Appendix 3. Results from factor analysis

| Sector - Family planning |                      |         |             |        |             |        |               |        |      |
|--------------------------|----------------------|---------|-------------|--------|-------------|--------|---------------|--------|------|
| Policy                   | Service and Programs |         | Advocacy    |        | Research    |        | Civil society |        |      |
| Obs.                     | 75                   | Obs.    | 53          | Obs.   | 73          | Obs.   | 75            | Obs.   | 80   |
| FP1_1                    | 0.54                 | FP2_1   | <b>0.47</b> | FP3_1  | <b>0.45</b> | FP4_1a | 0.66          | FP5_1  | 0.73 |
| FP1_2                    | <b>0.41</b>          | FP2_2   | <b>0.39</b> | FP3_2  | <b>0.31</b> | FP4_1b | 0.70          | FP5_2  | 0.70 |
| FP1_3                    | 0.62                 | FP2_3   | <b>0.46</b> | FP3_3  | <b>0.38</b> | FP4_1c | 0.70          | FP5_3  | 0.88 |
| FP1_4                    | <b>0.49</b>          | FP2_4   | <b>0.50</b> | FP3_4a | 0.50        | FP4_2  | 0.71          | FP5_4  | 0.88 |
| FP1_5                    | 0.74                 | FP2_5   | <b>0.25</b> | FP3_4b | 0.59        | FP4_3a | 0.64          | FP5_5  | 0.87 |
| FP1_6                    | 0.72                 | FP2_6a  | 0.74        | FP3_4c | 0.78        | FP4_3b | 0.73          | FP5_6  | 0.75 |
| FP1_7                    | 0.61                 | FP2_6b  | 0.65        | FP3_4d | 0.78        | FP4_3c | 0.60          | FP5_7  | 0.80 |
| FP1_8                    | 0.54                 | FP2_6c  | 0.62        | FP3_4e | 0.81        | FP4_4a | 0.77          | FP5_8  | 0.88 |
| FP1_9                    | <b>0.45</b>          | FP2_6d  | 0.75        | FP3_4f | 0.75        | FP4_4b | 0.74          | FP5_9  | 0.88 |
| FP1_10                   | 0.67                 | FP2_6e  | <b>0.44</b> | FP3_4g | 0.81        | FP4_4c | 0.77          | FP5_10 | 0.84 |
| FP1_11a                  | 0.59                 | FP2_6f  | <b>0.45</b> | FP3_5a | 0.73        | FP4_4d | 0.67          | FP5_11 | 0.78 |
| FP1_11b                  | <b>0.48</b>          | FP2_6g  | 0.50        | FP3_5b | 0.77        | FP4_5a | 0.69          | FP5_12 | 0.87 |
| FP1_12                   | <b>0.39</b>          | FP2_6h  | 0.57        | FP3_5c | 0.79        | FP4_5b | 0.78          | FP5_13 | 0.89 |
| FP1_13                   | 0.52                 | FP2_6i  | <b>0.38</b> | FP3_5d | 0.72        | FP4_5c | 0.76          | FP5_14 | 0.87 |
| FP1_14                   | 0.66                 | FP2_6j  | 0.63        | FP3_5e | 0.77        | FP4_5d | 0.79          |        |      |
|                          |                      | FP2_7a  | 0.75        | FP3_5f | 0.70        | FP4_6  | 0.66          |        |      |
|                          |                      | FP2_7b  | 0.61        | FP3_5g | 0.71        | FP4_7  | 0.69          |        |      |
|                          |                      | FP2_7c  | 0.66        | FP3_6  | 0.54        | FP4_8  | 0.74          |        |      |
|                          |                      | FP2_7d  | 0.75        |        |             | FP4_9  | 0.68          |        |      |
|                          |                      | FP2_7e  | 0.58        |        |             | FP4_10 | 0.72          |        |      |
|                          |                      | FP2_7f  | 0.53        |        |             | FP4_11 | 0.68          |        |      |
|                          |                      | FP2_7g  | 0.57        |        |             |        |               |        |      |
|                          |                      | FP2_8a  | 0.52        |        |             |        |               |        |      |
|                          |                      | FP2_8b  | <b>0.38</b> |        |             |        |               |        |      |
|                          |                      | FP2_8c  | 0.67        |        |             |        |               |        |      |
|                          |                      | FP2_8d  | 0.68        |        |             |        |               |        |      |
|                          |                      | FP2_9   | 0.62        |        |             |        |               |        |      |
|                          |                      | FP2_10  | <b>0.16</b> |        |             |        |               |        |      |
|                          |                      | FP2_11  | 0.51        |        |             |        |               |        |      |
|                          |                      | FP2_12  | 0.63        |        |             |        |               |        |      |
|                          |                      | FP2_13  | 0.78        |        |             |        |               |        |      |
|                          |                      | FP2_14  | 0.72        |        |             |        |               |        |      |
|                          |                      | FP2_15  | 0.57        |        |             |        |               |        |      |
|                          |                      | FP2_16  | <b>0.43</b> |        |             |        |               |        |      |
|                          |                      | FP2_17  | 0.54        |        |             |        |               |        |      |
|                          |                      | FP2_18  | <b>0.36</b> |        |             |        |               |        |      |
|                          |                      | FP2_19  | <b>0.45</b> |        |             |        |               |        |      |
|                          |                      | FP2_20  | 0.54        |        |             |        |               |        |      |
|                          |                      | FP2_21a | <b>0.20</b> |        |             |        |               |        |      |
|                          |                      | FP2_21b | <b>0.25</b> |        |             |        |               |        |      |
|                          |                      | FP2_21c | <b>0.11</b> |        |             |        |               |        |      |
|                          |                      | FP2_21d | <b>0.06</b> |        |             |        |               |        |      |
|                          |                      | FP2_21e | <b>0.29</b> |        |             |        |               |        |      |
|                          |                      | FP2_21f | <b>0.09</b> |        |             |        |               |        |      |

#### Note

Bolded and shaded are the loadings of items that were dropped because they loaded poorly (<0.5) on domain factors.

| Sector - Maternal and Child Health |                      |         |             |        |          |         |               |         |      |
|------------------------------------|----------------------|---------|-------------|--------|----------|---------|---------------|---------|------|
| Policy                             | Service and Programs |         | Advocacy    |        | Research |         | Civil society |         |      |
| Obs.                               | 60                   | Obs.    | 40          | Obs.   | 67       | Obs.    | 49            | Obs.    | 52   |
| MCH1_1a                            | 0.58                 | MCH2_1a | 0.80        | MCH3_1 | 0.78     | MCH4_1a | 0.80          | MCH5_1  | 0.87 |
| MCH1_1b                            | 0.69                 | MCH2_1b | 0.80        | MCH3_2 | 0.89     | MCH4_1b | 0.84          | MCH5_2  | 0.87 |
| MCH1_2                             | 0.67                 | MCH2_1c | 0.73        | MCH3_3 | 0.86     | MCH4_1c | 0.82          | MCH5_3  | 0.91 |
| MCH1_3                             | 0.65                 | MCH2_1d | 0.67        | MCH3_4 | 0.85     | MCH4_2  | 0.87          | MCH5_4  | 0.91 |
| MCH1_4                             | <b>0.40</b>          | MCH2_1e | 0.83        | MCH3_5 | 0.75     | MCH4_3a | 0.85          | MCH5_5  | 0.86 |
| MCH1_5                             | <b>0.49</b>          | MCH2_1f | 0.78        | MCH3_6 | 0.80     | MCH4_3b | 0.89          | MCH5_6  | 0.88 |
| MCH1_6                             | 0.66                 | MCH2_1g | 0.71        |        |          | MCH4_3c | 0.74          | MCH5_7  | 0.84 |
| MCH1_7                             | 0.81                 | MCH2_2a | 0.86        |        |          | MCH4_4a | 0.88          | MCH5_8  | 0.91 |
| MCH1_8                             | 0.65                 | MCH2_2b | 0.74        |        |          | MCH4_4b | 0.74          | MCH5_9  | 0.88 |
| MCH1_9                             | 0.82                 | MCH2_2c | 0.73        |        |          | MCH4_4c | 0.84          | MCH5_10 | 0.91 |
| MCH1_10                            | 0.68                 | MCH2_3a | 0.87        |        |          | MCH4_4d | 0.86          | MCH5_11 | 0.91 |
| MCH1_11                            | <b>0.24</b>          | MCH2_3b | 0.82        |        |          | MCH4_5a | 0.88          | MCH5_12 | 0.90 |
| MCH1_12                            | 0.58                 | MCH2_3c | 0.84        |        |          | MCH4_5b | 0.91          |         |      |
| MCH1_13a                           | 0.79                 | MCH2_3d | 0.91        |        |          | MCH4_5c | 0.94          |         |      |
| MCH1_13b                           | 0.81                 | MCH2_3e | <b>0.44</b> |        |          | MCH4_5d | 0.91          |         |      |
| MCH1_13c                           | 0.82                 | MCH2_3f | 0.62        |        |          | MCH4_5e | 0.92          |         |      |
| MCH1_13d                           | 0.82                 | MCH2_3g | 0.84        |        |          | MCH4_6  | 0.77          |         |      |
| MCH1_13e                           | 0.73                 | MCH2_3h | 0.78        |        |          | MCH4_7  | 0.74          |         |      |
|                                    |                      | MCH2_3i | 0.79        |        |          | MCH4_8  | 0.93          |         |      |
|                                    |                      | MCH2_4a | 0.84        |        |          | MCH4_9  | 0.87          |         |      |
|                                    |                      | MCH2_4b | 0.85        |        |          | MCH4_10 | 0.89          |         |      |
|                                    |                      | MCH2_4c | 0.88        |        |          | MCH4_11 | 0.87          |         |      |
|                                    |                      | MCH2_4d | 0.87        |        |          |         |               |         |      |
|                                    |                      | MCH2_5a | 0.84        |        |          |         |               |         |      |
|                                    |                      | MCH2_5b | 0.80        |        |          |         |               |         |      |
|                                    |                      | MCH2_5c | <b>0.22</b> |        |          |         |               |         |      |
|                                    |                      | MCH2_5d | 0.81        |        |          |         |               |         |      |
|                                    |                      | MCH2_5e | 0.79        |        |          |         |               |         |      |
|                                    |                      | MCH2_5f | 0.87        |        |          |         |               |         |      |
|                                    |                      | MCH2_5g | 0.72        |        |          |         |               |         |      |
|                                    |                      | MCH2_6a | 0.81        |        |          |         |               |         |      |
|                                    |                      | MCH2_6b | 0.87        |        |          |         |               |         |      |
|                                    |                      | MCH2_6c | 0.80        |        |          |         |               |         |      |
|                                    |                      | MCH2_6d | 0.77        |        |          |         |               |         |      |
|                                    |                      | MCH2_6e | 0.84        |        |          |         |               |         |      |
|                                    |                      | MCH2_7a | 0.80        |        |          |         |               |         |      |
|                                    |                      | MCH2_7b | 0.87        |        |          |         |               |         |      |
|                                    |                      | MCH2_7c | 0.67        |        |          |         |               |         |      |
|                                    |                      | MCH2_7d | 0.65        |        |          |         |               |         |      |
|                                    |                      | MCH2_7e | <b>0.35</b> |        |          |         |               |         |      |
|                                    |                      | MCH2_7f | <b>0.26</b> |        |          |         |               |         |      |
|                                    |                      | MCH2_7g | 0.66        |        |          |         |               |         |      |
|                                    |                      | MCH2_8a | 0.78        |        |          |         |               |         |      |
|                                    |                      | MCH2_8b | 0.86        |        |          |         |               |         |      |

**Note**

Bolded and shaded are the loadings of items that were dropped because they loaded poorly (<0.5) on domain factors.

| <b>Sector – Education</b> |                             |             |                 |             |                 |             |                      |             |           |
|---------------------------|-----------------------------|-------------|-----------------|-------------|-----------------|-------------|----------------------|-------------|-----------|
| <b>Policy</b>             | <b>Service and Programs</b> |             | <b>Advocacy</b> |             | <b>Research</b> |             | <b>Civil society</b> |             |           |
| <b>Obs.</b>               | <b>41</b>                   | <b>Obs.</b> | <b>52</b>       | <b>Obs.</b> | <b>53</b>       | <b>Obs.</b> | <b>35</b>            | <b>Obs.</b> | <b>44</b> |
| ED1_1                     | 0.74                        | ED2_1       | 0.78            | ED3_1       | 0.76            | ED4_1a      | 0.77                 | ED5_1       | 0.92      |
| ED1_2a                    | 0.79                        | ED2_2a      | 0.79            | ED3_2       | 0.80            | ED4_1b      | 0.88                 | ED5_2       | 0.92      |
| ED1_2b                    | 0.76                        | ED2_2b      | 0.85            | ED3_3       | 0.87            | ED4_1c      | 0.85                 | ED5_3       | 0.94      |
| ED1_3                     | 0.77                        | ED2_3       | 0.84            | ED3_4       | 0.88            | ED4_2       | 0.86                 | ED5_4       | 0.93      |
| ED1_4                     | 0.77                        | ED2_4       | 0.88            |             |                 | ED4_3a      | 0.76                 | ED5_5       | 0.94      |
| ED1_5                     | 0.87                        | ED2_5       | 0.70            |             |                 | ED4_3b      | 0.74                 | ED5_6       | 0.85      |
| ED1_6                     | 0.77                        | ED2_6       | 0.74            |             |                 | ED4_3c      | 0.79                 | ED5_7       | 0.91      |
| ED1_7                     | 0.78                        |             |                 |             |                 | ED4_4a      | 0.82                 | ED5_8       | 0.92      |
| ED1_8                     | 0.73                        |             |                 |             |                 | ED4_4b      | 0.80                 | ED5_9       | 0.93      |
| ED1_9a                    | 0.72                        |             |                 |             |                 | ED4_4c      | 0.77                 | ED5_10      | 0.94      |
| ED1_9b                    | 0.82                        |             |                 |             |                 | ED4_4d      | 0.74                 | ED5_11      | 0.94      |
| ED1_9c                    | 0.85                        |             |                 |             |                 | ED4_5a      | 0.84                 |             |           |
| ED1_10a                   | 0.78                        |             |                 |             |                 | ED4_5b      | 0.88                 |             |           |
| ED1_10b                   | 0.76                        |             |                 |             |                 | ED4_5c      | 0.92                 |             |           |
| ED1_11                    | 0.81                        |             |                 |             |                 | ED4_5d      | 0.92                 |             |           |
| ED1_12                    | 0.71                        |             |                 |             |                 | ED4_6       | 0.87                 |             |           |
| ED1_13                    | 0.74                        |             |                 |             |                 | ED4_7       | 0.85                 |             |           |
|                           |                             |             |                 |             |                 | ED4_8       | 0.89                 |             |           |
|                           |                             |             |                 |             |                 | ED4_9       | 0.87                 |             |           |
|                           |                             |             |                 |             |                 | ED4_10      | 0.90                 |             |           |
|                           |                             |             |                 |             |                 | ED4_11a     | 0.93                 |             |           |
|                           |                             |             |                 |             |                 | ED4_11b     | 0.91                 |             |           |

**Note**

Bolded and shaded are the loadings of items that were dropped because they loaded poorly (<0.5) on domain factors.

| <b>Sector - Women Empowerment</b> |                             |        |                 |       |                 |        |                      |        |           |
|-----------------------------------|-----------------------------|--------|-----------------|-------|-----------------|--------|----------------------|--------|-----------|
| <b>Policy</b>                     | <b>Service and Programs</b> |        | <b>Advocacy</b> |       | <b>Research</b> |        | <b>Civil society</b> |        |           |
| Obs.                              | <b>55</b>                   | Obs.   | <b>62</b>       | Obs.  | <b>66</b>       | Obs.   | <b>42</b>            | Obs.   | <b>60</b> |
| WE1_1                             | 0.69                        | WE2_1  | 0.90            | WE3_1 | 0.88            | WE4_1a | 0.81                 | WE5_1  | 0.84      |
| WE1_2                             | 0.79                        | WE2_2  | 0.90            | WE3_2 | 0.87            | WE4_1b | 0.86                 | WE5_2  | 0.90      |
| WE1_3                             | 0.77                        | WE2_3  | 0.73            | WE3_3 | 0.85            | WE4_1c | 0.84                 | WE5_3  | 0.89      |
| WE1_4                             | 0.84                        | WE2_4  | 0.90            | WE3_4 | 0.86            | WE4_2  | 0.91                 | WE5_4  | 0.85      |
| WE1_5                             | 0.88                        | WE2_5  | 0.86            | WE3_5 | 0.76            | WE4_3a | 0.85                 | WE5_5  | 0.91      |
| WE1_6                             | 0.75                        | WE2_6  | 0.80            | WE3_6 | 0.86            | WE4_3b | 0.82                 | WE5_6  | 0.89      |
| WE1_7                             | 0.74                        | WE2_7  | 0.76            | WE3_7 | 0.85            | WE4_3c | 0.73                 | WE5_7  | 0.83      |
| WE1_8a                            | 0.72                        | WE2_8  | 0.77            |       |                 | WE4_4a | 0.86                 | WE5_8  | 0.92      |
| WE1_8b                            | 0.87                        | WE2_9  | 0.89            |       |                 | WE4_4b | 0.95                 | WE5_9  | 0.87      |
| WE1_9                             | 0.91                        | WE2_10 | 0.74            |       |                 | WE4_4c | 0.95                 | WE5_10 | 0.90      |
| WE1_10                            | 0.81                        | WE2_11 | 0.87            |       |                 | WE4_4d | 0.93                 |        |           |
| WE1_11                            | 0.76                        | WE2_12 | 0.68            |       |                 | WE4_5a | 0.88                 |        |           |
| WE1_12                            | 0.83                        |        |                 |       |                 | WE4_5b | 0.93                 |        |           |
| WE1_13a                           | 0.75                        |        |                 |       |                 | WE4_5c | 0.92                 |        |           |
| WE1_13b                           | 0.91                        |        |                 |       |                 | WE4_6  | 0.95                 |        |           |
| WE1_14                            | 0.88                        |        |                 |       |                 | WE4_7  | 0.94                 |        |           |
| WE1_15                            | 0.92                        |        |                 |       |                 | WE4_8  | 0.96                 |        |           |
| WE1_16                            | 0.84                        |        |                 |       |                 | WE4_9  | 0.90                 |        |           |
| WE1_17a                           | 0.87                        |        |                 |       |                 | WE4_10 | 0.83                 |        |           |
| WE1_17b                           | 0.91                        |        |                 |       |                 |        |                      |        |           |
| WE1_17c                           | 0.86                        |        |                 |       |                 |        |                      |        |           |
| WE1_17d                           | 0.93                        |        |                 |       |                 |        |                      |        |           |
| WE1_18                            | 0.89                        |        |                 |       |                 |        |                      |        |           |

**Note**

Bolded and shaded are the loadings of items that were dropped because they loaded poorly (<0.5) on domain factors.

| <b>Sector - Labor market</b>               |                             |             |                 |             |                 |             |                      |             |           |
|--------------------------------------------|-----------------------------|-------------|-----------------|-------------|-----------------|-------------|----------------------|-------------|-----------|
| <b>Policy</b>                              | <b>Service and Programs</b> |             | <b>Advocacy</b> |             | <b>Research</b> |             | <b>Civil society</b> |             |           |
| <b>Obs.</b>                                | <b>51</b>                   | <b>Obs.</b> | <b>51</b>       | <b>Obs.</b> | <b>54</b>       | <b>Obs.</b> | <b>46</b>            | <b>Obs.</b> | <b>47</b> |
| LM1_1a                                     | <b>0.47</b>                 | LM2_1       | 0.75            | LM3_1       | 0.56            | LM4_1a      | 0.79                 | LM5_1       | 0.84      |
| LM1_1b                                     | <b>0.36</b>                 | LM2_2       | 0.87            | LM3_2       | 0.81            | LM4_1b      | 0.78                 | LM5_2       | 0.92      |
| LM1_2                                      | <b>0.33</b>                 | LM2_3       | 0.73            | LM3_3       | 0.61            | LM4_1c      | 0.88                 | LM5_3       | 0.91      |
| LM1_3                                      | 0.71                        | LM2_4       | 0.88            | LM3_4       | 0.84            | LM4_2       | 0.80                 | LM5_4       | 0.92      |
| LM1_4a                                     | 0.58                        | LM2_5       | 0.88            | LM3_5       | 0.88            | LM4_3a      | 0.75                 | LM5_5       | 0.87      |
| LM1_4b                                     | 0.62                        | LM2_6       | 0.88            |             |                 | LM4_3b      | 0.76                 | LM5_6       | 0.92      |
| LM1_5                                      | 0.82                        | LM2_7       | 0.86            |             |                 | LM4_3c      | 0.79                 | LM5_7       | 0.87      |
| LM1_6                                      | 0.82                        | LM2_8       | 0.78            |             |                 | LM4_4a      | 0.74                 | LM5_8       | 0.89      |
| LM1_7                                      | 0.88                        | LM2_9       | 0.64            |             |                 | LM4_4b      | 0.79                 | LM5_9       | 0.87      |
| LM1_8                                      | 0.86                        | LM2_10      | 0.73            |             |                 | LM4_4c      | 0.71                 | LM5_10      | 0.84      |
| LM1_9                                      | 0.84                        | LM2_11      | 0.63            |             |                 | LM4_4d      | 0.77                 |             |           |
| LM1_10                                     | 0.81                        | LM2_12a     | 0.58            |             |                 | LM4_5a      | 0.84                 |             |           |
| LM1_11                                     | 0.82                        | LM2_12b     | 0.67            |             |                 | LM4_5b      | 0.84                 |             |           |
| LM1_12                                     | 0.87                        | LM2_13      | 0.66            |             |                 | LM4_5c      | 0.78                 |             |           |
| LM1_13                                     | 0.70                        | LM2_14      | 0.80            |             |                 | LM4_6       | 0.88                 |             |           |
| LM1_14                                     | 0.76                        | LM2_15      | 0.82            |             |                 | LM4_7       | 0.78                 |             |           |
| LM1_15                                     | 0.76                        |             |                 |             |                 | LM4_8       | 0.79                 |             |           |
|                                            |                             |             |                 |             |                 | LM4_9       | 0.73                 |             |           |
|                                            |                             |             |                 |             |                 | LM4_10      | 0.77                 |             |           |
|                                            |                             |             |                 |             |                 | LM4_11      | 0.82                 |             |           |
| <b>Governance and Economic Institution</b> |                             |             |                 |             |                 |             |                      |             |           |
| <b>Policy</b>                              | <b>Service and Programs</b> |             | <b>Advocacy</b> |             | <b>Research</b> |             | <b>Civil society</b> |             |           |
| <b>Obs.</b>                                | <b>37</b>                   | <b>Obs.</b> | <b>40</b>       | <b>Obs.</b> | <b>30</b>       | <b>Obs.</b> | <b>26</b>            | <b>Obs.</b> | <b>43</b> |
| GEI1_1                                     | 0.85                        | GEI2_1      | 0.91            | GEI3_1      | 0.65            | GEI4_1a     | 0.85                 | GEI5_1      | 0.72      |
| GEI1_2                                     | 0.78                        | GEI2_2      | 0.91            | GEI3_2      | 0.81            | GEI4_1b     | 0.89                 | GEI5_2      | 0.89      |
| GEI1_3                                     | 0.84                        | GEI2_3      | 0.88            | GEI3_3      | 0.62            | GEI4_1c     | 0.70                 | GEI5_3      | 0.84      |
| GEI1_4                                     | 0.86                        | GEI2_4      | 0.91            | GEI3_4      | 0.64            | GEI4_2      | 0.72                 | GEI5_4      | 0.83      |
| GEI1_5                                     | 0.89                        | GEI2_5      | 0.82            | GEI3_5      | 0.81            | GEI4_3a     | 0.87                 | GEI5_5      | 0.78      |
| GEI1_6                                     | 0.82                        | GEI2_6      | 0.91            | GEI3_6a     | 0.90            | GEI4_3b     | 0.88                 | GEI5_6      | 0.73      |
| GEI1_7                                     | 0.90                        | GEI2_7      | 0.79            | GEI3_6b     | 0.80            | GEI4_3c     | 0.84                 | GEI5_7a     | 0.77      |
| GEI1_8                                     | 0.89                        | GEI2_8a     | 0.88            | GEI3_6c     | 0.67            | GEI4_4a     | 0.85                 | GEI5_7b     | 0.71      |
| GEI1_9a                                    | 0.90                        | GEI2_8b     | 0.88            | GEI3_6d     | 0.59            | GEI4_4b     | 0.92                 | GEI5_8      | 0.84      |
| GEI1_9b                                    | 0.91                        | GEI2_8c     | 0.80            | GEI3_6e     | 0.87            | GEI4_4c     | 0.87                 | GEI5_9      | 0.72      |
| GEI1_10a                                   | 0.57                        | GEI2_8d     | 0.80            | GEI3_6f     | 0.80            | GEI4_4d     | 0.91                 |             |           |
| GEI1_10b                                   | <b>0.42</b>                 | GEI2_8e     | 0.79            |             |                 | GEI4_5a     | 0.92                 |             |           |
| GEI1_10c                                   | 0.76                        | GEI2_9      | 0.77            |             |                 | GEI4_5b     | 0.77                 |             |           |
| GEI1_11                                    | 0.73                        | GEI2_10a    | 0.89            |             |                 | GEI4_5c     | 0.89                 |             |           |
| GEI1_12                                    | 0.70                        | GEI2_10b    | 0.87            |             |                 | GEI4_5d     | 0.93                 |             |           |
| GEI1_13                                    | 0.79                        | GEI2_10c    | 0.83            |             |                 | GEI4_6      | 0.88                 |             |           |
|                                            |                             | GEI2_10d    | 0.79            |             |                 | GEI4_7      | 0.84                 |             |           |
|                                            |                             | GEI2_11a    | 0.85            |             |                 | GEI4_8      | 0.94                 |             |           |
|                                            |                             | GEI2_11c    | 0.82            |             |                 | GEI4_10     | 0.81                 |             |           |
|                                            |                             | GEI2_11d    | 0.82            |             |                 |             |                      |             |           |

**Note**

Bolded and shaded are the loadings of items that were dropped because they loaded poorly (<0.5) on domain factors.
