# Supplementary material
Source: HighWire-hosted journal article supplement (https://bmjopen.bmj.com/content/13/3/e059937)
Supplement: inline-supplementary-material-5 [file inline-supplementary-material-5.pdf]

## Appendix 5. Heterogeneity testing

### 1. Heterogeneity testing by domains and countries (Fixed effect)

|                 | Policy | Programs      | Advocacy | Research | Civil society | Overall | Between sub-groups test |
|-----------------|--------|---------------|----------|----------|---------------|---------|-------------------------|
| <b>Ethiopia</b> |        |               |          |          |               |         |                         |
| Statistic       | 0.37   | 0.58          | 1.44     | 0.96     | 0.46          | 5.74    | 1.94                    |
| P-Value         | 1.00   | 0.99          | 0.92     | 0.97     | 0.99          | 1.00    | 0.75                    |
| I-squared       | 0.00%  | 0.00%         | 0.00%    | 0.00%    | 0.00%         | 0.00%   |                         |
| <b>Kenya</b>    |        |               |          |          |               |         |                         |
| Statistic       | 0.52   | 1.47          | 0.95     | 0.80     | 0.20          | 4.53    | 0.59                    |
| P-Value         | 0.99   | 0.92          | 0.97     | 0.98     | 1.00          | 1.00    | 0.96                    |
| I-squared       | 0.00%  | 0.00%         | 0.00%    | 0.00%    | 0.00%         | 0.00%   |                         |
| <b>Nigeria</b>  |        |               |          |          |               |         |                         |
| Statistic       | 1.54   | 1.34          | 1.20     | 0.91     | 0.99          | 6.58    | 0.60                    |
| P-Value         | 0.91   | 0.93          | 0.95     | 0.97     | 0.96          | 1.00    | 0.96                    |
| I-squared       | 0.00%  | 0.00%         | 0.00%    | 0.00%    | 0.00%         | 0.00%   |                         |
| <b>Rwanda</b>   |        |               |          |          |               |         |                         |
| Statistic       | 3.33   | 11.24         | 3.78     | 4.68     | 3.24          | 29.93   | 3.66                    |
| P-Value         | 0.65   | 0.05          | 0.58     | 0.46     | 0.66          | 0.42    | 0.45                    |
| I-squared       | 0.00%  | <b>55.50%</b> | 0.00%    | 0.00%    | 0.00%         | 3.10%   |                         |
| <b>Senegal</b>  |        |               |          |          |               |         |                         |
| Statistic       | 0.33   | 2.00          | 1.29     | 0.92     | 1.57          | 8.23    | 2.12                    |
| P-Value         | 1.00   | 0.85          | 0.94     | 0.97     | 0.90          | 1.00    | 0.71                    |
| I-squared       | 0.00%  | 0.00%         | 0.00%    | 0.00%    | 0.00%         | 0.00%   |                         |
| <b>Tanzania</b> |        |               |          |          |               |         |                         |
| Statistic       | 1.17   | 1.16          | 1.22     | 1.28     | 3.15          | 10.13   | 2.14                    |
| P-Value         | 0.95   | 0.95          | 0.94     | 0.94     | 0.68          | 1.00    | 0.71                    |
| I-squared       | 0.00%  | 0.00%         | 0.00%    | 0.00%    | 0.00%         | 0.00%   |                         |

## 2. Heterogeneity testing by domains and countries (Random effect)

|                 |             | Policy | Programs      | Advocacy | Research | CSO   | Overall |
|-----------------|-------------|--------|---------------|----------|----------|-------|---------|
| <b>Ethiopia</b> |             |        |               |          |          |       |         |
|                 | Statistic   | 0.37   | 0.58          | 1.44     | 0.96     | 0.46  | 5.74    |
|                 | P           | 1.00   | 0.99          | 0.92     | 0.97     | 0.99  | 1.00    |
|                 | I-squared   | 0.00%  | 0.00%         | 0.00%    | 0.00%    | 0.00% | 0.00%   |
|                 | Tau-squared | 0.00   | 0.00          | 0.00     | 0.00     | 0.00  | 0.00    |
| <b>Kenya</b>    |             |        |               |          |          |       |         |
|                 | Statistic   | 0.52   | 1.47          | 0.95     | 0.80     | 0.20  | 4.53    |
|                 | P           | 0.99   | 0.92          | 0.97     | 0.98     | 1.00  | 1.00    |
|                 | I-squared   | 0.00%  | 0.00%         | 0.00%    | 0.00%    | 0.00% | 0.00%   |
|                 | Tau-squared | 0.00   | 0.00          | 0.00     | 0.00     | 0.00  | 0.00    |
| <b>Nigeria</b>  |             |        |               |          |          |       |         |
|                 | Statistic   | 1.54   | 1.34          | 1.20     | 0.91     | 0.99  | 6.58    |
|                 | P           | 0.91   | 0.93          | 0.95     | 0.97     | 0.96  | 1.00    |
|                 | I-squared   | 0.00%  | 0.00%         | 0.00%    | 0.00%    | 0.00% | 0.00%   |
|                 | Tau-squared | 0.00   | 0.00          | 0.00     | 0.00     | 0.00  | 0.00    |
| <b>Rwanda</b>   |             |        |               |          |          |       |         |
|                 | Statistic   | 3.33   | 11.24         | 3.78     | 4.68     | 3.24  | 29.93   |
|                 | P           | 0.65   | 0.05          | 0.58     | 0.46     | 0.66  | 0.42    |
|                 | I-squared   | 0.00%  | <b>55.50%</b> | 0.00%    | 0.00%    | 0.00% | 3.10%   |
|                 | Tau-squared | 0.00   | <b>0.46</b>   | 0.00     | 0.00     | 0.00  | 0.01    |
| <b>Senegal</b>  |             |        |               |          |          |       |         |
|                 | Statistic   | 0.33   | 2.00          | 1.29     | 0.92     | 1.57  | 8.23    |
|                 | P           | 1.00   | 0.85          | 0.94     | 0.97     | 0.90  | 1.00    |
|                 | I-squared   | 0.00%  | 0.00%         | 0.00%    | 0.00%    | 0.00% | 0.00%   |
|                 | Tau-squared | 0.00   | 0.00          | 0.00     | 0.00     | 0.00  | 0.00    |
| <b>Tanzania</b> |             |        |               |          |          |       |         |
|                 | Statistic   | 1.17   | 1.16          | 1.22     | 1.28     | 3.15  | 10.13   |
|                 | P           | 0.95   | 0.95          | 0.94     | 0.94     | 0.68  | 1.00    |
|                 | I-squared   | 0.00%  | 0.00%         | 0.00%    | 0.00%    | 0.00% | 0.00%   |
|                 | Tau-squared | 0.00   | 0.00          | 0.00     | 0.00     | 0.00  | 0.00    |
