# Supplementary material
Source: HighWire-hosted journal article supplement (https://bmjopen.bmj.com/content/13/3/e059937)
Supplement: inline-supplementary-material-6 [file inline-supplementary-material-6.pdf]

**Appendix 6. Percentages of “don’t know” by question/item**

| Variable                                                                         | Ethiopia |   | Kenya |   | Nigeria |   | Rwanda |   | Senegal |   | Tanzania |     |
|----------------------------------------------------------------------------------|----------|---|-------|---|---------|---|--------|---|---------|---|----------|-----|
|                                                                                  | n        | % | n     | % | n       | % | n      | % | n       | % | n        | %   |
| FP 1.1 Prominence of Family Planning (FP): Extent to which there is a permanent  |          |   |       |   |         |   |        |   |         |   |          |     |
| Don't know                                                                       | 0        | 0 | 0     | 0 | 0       | 0 | 0      | 0 | 0       | 0 | 1        | 2.6 |
| FP 1.1 Prominence of Family Planning (FP): Extent to which there is a permanent  |          |   |       |   |         |   |        |   |         |   |          |     |
| Don't know                                                                       | 0        | 0 | 0     | 0 | 0       | 0 | 0      | 0 | 0       | 0 | 1        | 2.6 |
| FP 1.2 Policy on Fertility Reduction and FP: Extent to which government policy e |          |   |       |   |         |   |        |   |         |   |          |     |
| FP 1.3 National FP Strategic Plan: Extent to which there is a current, comprehen |          |   |       |   |         |   |        |   |         |   |          |     |
| FP 1.4 Policy on Age at Marriage: Extent to which legal age at marriage for fema |          |   |       |   |         |   |        |   |         |   |          |     |
| Don't know                                                                       | 0        | 0 | 0     | 0 | 0       | 0 | 0      | 0 | 0       | 0 | 1        | 2.6 |
| FP 1.5 Evidence-Based Policymaking: Extent to which the appropriate ministry act |          |   |       |   |         |   |        |   |         |   |          |     |
| FP 1.6 Monitoring and Evaluation of National Policies/Plans/Strategies: Extent t |          |   |       |   |         |   |        |   |         |   |          |     |
| Don't know                                                                       | 0        | 0 | 0     | 0 | 0       | 0 | 0      | 0 | 0       | 0 | 3        | 7.9 |
| FP 1.7 Inclusion of Nongovernmental and Cross-sectoral Actors in Policy/Strategy |          |   |       |   |         |   |        |   |         |   |          |     |
| Don't know                                                                       | 0        | 0 | 0     | 0 | 0       | 0 | 0      | 0 | 0       | 0 | 1        | 2.6 |

**Note:**

- For readability purpose, complete wording for questions/variables has been provided as Appendix 1.
- Only the percentages of respondents who responded “don’t know” to the respective question or sub-question was included in this table.
- Highlighted are values > 10%

|                                                                                   |   |      |   |      |   |     |   |   |   |   |   |      |
|-----------------------------------------------------------------------------------|---|------|---|------|---|-----|---|---|---|---|---|------|
| FP 1.8 Financing for FP: Extent to which the government has established and appl  |   |      |   |      |   |     |   |   |   |   |   |      |
| Don't know                                                                        | 1 | 5.9  | 1 | 5.9  | 0 | 0   | 0 | 0 | 0 | 0 | 2 | 5.3  |
| FP 1.9 Percent of In-country Funding of FP Budget: Extent to which the total fam  |   |      |   |      |   |     |   |   |   |   |   |      |
| Don't know                                                                        | 4 | 23.5 | 1 | 5.9  | 0 | 0   | 0 | 0 | 0 | 0 | 3 | 7.9  |
| FP 1.10 Information/Communications Technology Infrastructure/Capacity:~† Extent t |   |      |   |      |   |     |   |   |   |   |   |      |
| Don't know                                                                        | 0 | 0    | 1 | 5.9  | 1 | 5.6 | 0 | 0 | 0 | 0 | 0 | 0    |
| FP 1.11 Import Laws and Legal Regulations:~†                                      |   |      |   |      |   |     |   |   |   |   |   |      |
| Don't know                                                                        | 0 | 0    | 5 | 29.4 | 1 | 5.6 | 0 | 0 | 0 | 0 | 2 | 5.3  |
| Don't know                                                                        | 1 | 5.9  | 3 | 17.6 | 1 | 5.6 | 0 | 0 | 0 | 0 | 4 | 12.1 |
| FP 1.12 Advertising of Contraceptives Allowed: Extent of freedom from restrictio  |   |      |   |      |   |     |   |   |   |   |   |      |
| Don't know                                                                        | 0 | 0    | 1 | 5.9  | 0 | 0   | 0 | 0 | 0 | 0 | 0 | 0    |
| FP 1.13 Presence of Pro-Poor FP Policies: Extent to which policies specifically   |   |      |   |      |   |     |   |   |   |   |   |      |
| Don't know                                                                        | 0 | 0    | 0 | 0    | 0 | 0   | 0 | 0 | 0 | 0 | 1 | 2.6  |
| FP 1.14 Political Support for FP: Extent to which elected officials in the count  |   |      |   |      |   |     |   |   |   |   |   |      |
| FP 2.1 Administrative Structure: Extent to which the administrative structure an  |   |      |   |      |   |     |   |   |   |   |   |      |
| Don't know                                                                        | 0 | 0    | 0 | 0    | 0 | 0   | 0 | 0 | 0 | 0 | 1 | 2.9  |
| FP 2.2 Level of Program Leaders: Relative level of seniority of the director of   |   |      |   |      |   |     |   |   |   |   |   |      |
| Don't know                                                                        | 2 | 13.3 | 0 | 0    | 4 | 25  | 0 | 0 | 0 | 0 | 1 | 2.9  |

**Note:**

- For readability purpose, complete wording for questions/variables has been provided as Appendix 1.
- Only the percentages of respondents who responded “don’t know” to the respective question or sub-question was included in this table.
- Highlighted are values > 10%

|                                                                                  |   |     |   |      |   |      |   |   |   |      |   |      |
|----------------------------------------------------------------------------------|---|-----|---|------|---|------|---|---|---|------|---|------|
| FP. 2.3 Community-Based Distribution: Extent to which areas of the country not e |   |     |   |      |   |      |   |   |   |      |   |      |
| Don't know                                                                       | 0 | 0   | 1 | 6.2  | 0 | 0    | 0 | 0 | 0 | 0    | 1 | 2.9  |
| FP 2.4 Postpartum Program: Extent to which all postpartum women receive postpart |   |     |   |      |   |      |   |   |   |      |   |      |
| Don't know                                                                       | 0 | 0   | 0 | 0    | 1 | 6.2  | 0 | 0 | 0 | 0    | 0 | 0    |
| FP 2.5 Home-Visiting Workers: Extent of coverage of population by workers whose  |   |     |   |      |   |      |   |   |   |      |   |      |
| Don't know                                                                       | 0 | 0   | 1 | 6.2  | 1 | 6.2  | 0 | 0 | 0 | 0    | 1 | 2.9  |
| FP 2.6 Availability and Accessibility of FP Commodities/Supplies and Services Pa |   |     |   |      |   |      |   |   |   |      |   |      |
| FP 2.6.1                                                                         | 1 | 6.7 | 2 | 12.5 | 0 | 0    | 0 | 0 | 0 | 0    | 3 | 8.6  |
| FP 2.6.2                                                                         | 0 | 0   | 1 | 6.2  | 0 | 0    | 0 | 0 | 0 | 0    | 1 | 3    |
| FP 2.6.3                                                                         | 0 | 0   | 1 | 6.2  | 2 | 13.3 | 0 | 0 | 0 | 0    | 2 | 5.7  |
| FP 2.6.4                                                                         | 0 | 0   | 1 | 6.2  | 0 | 0    | 0 | 0 | 0 | 0    | 1 | 2.9  |
| FP 2.7 Availability and Accessibility of FP Commodities/Supplies and Services Pa |   |     |   |      |   |      |   |   |   |      |   |      |
| FP 2.7.1                                                                         | 0 | 0   | 0 | 0    | 0 | 0    | 0 | 0 | 0 | 0    | 3 | 8.6  |
| FP 2.7.2                                                                         | 0 | 0   | 0 | 0    | 0 | 0    | 0 | 0 | 0 | 0    | 3 | 8.6  |
| FP 2.7.3                                                                         | 0 | 0   | 0 | 0    | 0 | 0    | 0 | 0 | 1 | 14.3 | 3 | 8.6  |
| FP 2.7.4                                                                         | 0 | 0   | 0 | 0    | 1 | 6.2  | 0 | 0 | 0 | 0    | 3 | 8.6  |
| FP 2.7.5                                                                         | 0 | 0   | 0 | 0    | 0 | 0    | 0 | 0 | 1 | 14.3 | 3 | 8.8  |
| FP 2.7.6                                                                         | 0 | 0   | 0 | 0    | 3 | 18.8 | 0 | 0 | 0 | 0    | 4 | 11.4 |
| FP 2.7.7                                                                         | 0 | 0   | 1 | 6.2  | 1 | 6.2  | 0 | 0 | 0 | 0    | 4 | 11.4 |

**Note:**

- For readability purpose, complete wording for questions/variables has been provided as Appendix 1.
- Only the percentages of respondents who responded “don’t know” to the respective question or sub-question was included in this table.
- Highlighted are values > 10%

|                                                                                  |   |   |   |      |   |     |   |   |   |   |   |      |
|----------------------------------------------------------------------------------|---|---|---|------|---|-----|---|---|---|---|---|------|
| FP 2.8 Availability and Accessibility of FP Commodities/Supplies and Services Pa |   |   |   |      |   |     |   |   |   |   |   |      |
| FP 2.8.1                                                                         | 0 | 0 | 2 | 12.5 | 1 | 6.2 | 0 | 0 | 0 | 0 | 4 | 11.4 |
| FP 2.8.2                                                                         | 0 | 0 | 2 | 12.5 | 1 | 6.2 | 0 | 0 | 0 | 0 | 4 | 11.4 |
| FP 2.8.3                                                                         | 0 | 0 | 0 | 0    | 0 | 0   | 0 | 0 | 0 | 0 | 3 | 8.6  |
| FP 2.8.4                                                                         | 0 | 0 | 0 | 0    | 0 | 0   | 0 | 0 | 0 | 0 | 3 | 8.6  |
| FP 2.9 FP Service Quality: Please rate the general quality of family planning se |   |   |   |      |   |     |   |   |   |   |   |      |
| FP 2.10 Incentives and Disincentives: Extent to which monetary or other incentiv |   |   |   |      |   |     |   |   |   |   |   |      |
| Don't know                                                                       | 0 | 0 | 1 | 6.2  | 1 | 6.2 | 0 | 0 | 0 | 0 | 3 | 8.6  |
| FP 2.11 Adolescent Programs: Extent to which information, services and activitie |   |   |   |      |   |     |   |   |   |   |   |      |
| Don't know                                                                       | 0 | 0 | 1 | 6.2  | 0 | 0   | 0 | 0 | 0 | 0 | 0 | 0    |
| FP 2.12 Training Program: Extent to which training programs, for each category o |   |   |   |      |   |     |   |   |   |   |   |      |
| Don't know                                                                       | 0 | 0 | 1 | 6.2  | 0 | 0   | 0 | 0 | 0 | 0 | 1 | 2.9  |
| FP 2.13 Personnel Carry Out Assigned Tasks: Extent to which all categories of fa |   |   |   |      |   |     |   |   |   |   |   |      |
| Don't know                                                                       | 0 | 0 | 1 | 6.2  | 0 | 0   | 0 | 0 | 0 | 0 | 2 | 5.7  |
| FP 2.14 Logistics and Transport: Extent to which the logistics and transport sys |   |   |   |      |   |     |   |   |   |   |   |      |
| Don't know                                                                       | 0 | 0 | 0 | 0    | 0 | 0   | 0 | 0 | 0 | 0 | 3 | 8.6  |
| FP 2.15 Supervision System: Extent to which the system of supervision at all lev |   |   |   |      |   |     |   |   |   |   |   |      |
| Don't know                                                                       | 0 | 0 | 0 | 0    | 0 | 0   | 0 | 0 | 0 | 0 | 1 | 2.9  |

**Note:**

- For readability purpose, complete wording for questions/variables has been provided as Appendix 1.
- Only the percentages of respondents who responded “don’t know” to the respective question or sub-question was included in this table.
- Highlighted are values > 10%

|                                                                                    |   |   |   |     |   |   |   |   |   |   |     |
|------------------------------------------------------------------------------------|---|---|---|-----|---|---|---|---|---|---|-----|
| FP 2.16 Involvement of Other Ministries and Public Agencies: Extent to which oth   |   |   |   |     |   |   |   |   |   |   |     |
| Don't know                                                                         | 0 | 0 | 0 | 0   | 0 | 0 | 0 | 0 | 0 | 1 | 2.9 |
| FP 2.17 Involvement of Private-Sector Agencies and Groups: Extent to which priva   |   |   |   |     |   |   |   |   |   |   |     |
| FP 2.18 Mass Media for Information Education Communication: Frequency and extent   |   |   |   |     |   |   |   |   |   |   |     |
| FP 2.19 Cultural and Social Norms Barriers: Extent to which cultural and social    |   |   |   |     |   |   |   |   |   |   |     |
| FP 2.20 Youth: Extent to which the government supports youth-led FP initiatives    |   |   |   |     |   |   |   |   |   |   |     |
| FP 2.21 FP Effort Influences ,Äì Forces Affecting the FP Program: Forces affecting |   |   |   |     |   |   |   |   |   |   |     |
| FP 2.21.1                                                                          | 0 | 0 | 0 | 0   | 0 | 0 | 0 | 0 | 0 | 2 | 5.9 |
| FP 2.21.2                                                                          | 0 | 0 | 0 | 0   | 0 | 0 | 0 | 0 | 0 | 1 | 3   |
| FP 2.21.3                                                                          | 0 | 0 | 0 | 0   | 0 | 0 | 0 | 0 | 0 | 2 | 5.9 |
| FP 2.21.4                                                                          | 0 | 0 | 1 | 6.2 | 0 | 0 | 0 | 0 | 0 | 1 | 2.9 |
| FP 2.21.5                                                                          | 0 | 0 | 0 | 0   | 0 | 0 | 0 | 0 | 0 | 2 | 5.9 |
| FP 3.1 Influence of FP Leaders/Champions: Extent to which the country has one or   |   |   |   |     |   |   |   |   |   |   |     |
| Don't know                                                                         | 0 | 0 | 0 | 0   | 0 | 0 | 0 | 0 | 0 | 1 | 2.9 |
| FP 3.2 Statement by Leaders: Extent to which the head of government, as well as    |   |   |   |     |   |   |   |   |   |   |     |
| FP 3.3 Media Coverage for FP: Extent to and frequency with which national media    |   |   |   |     |   |   |   |   |   |   |     |

**Note:**

- For readability purpose, complete wording for questions/variables has been provided as Appendix 1.
- Only the percentages of respondents who responded “don’t know” to the respective question or sub-question was included in this table.
- Highlighted are values > 10%

FP 3.4 FP Effort Influences - Justification: How important is each of the follow

|                                                                                   |   |   |   |      |   |      |   |   |   |   |     |
|-----------------------------------------------------------------------------------|---|---|---|------|---|------|---|---|---|---|-----|
| FP 3.4.1                                                                          | 0 | 0 | 0 | 0    | 0 | 0    | 0 | 0 | 0 | 1 | 2.9 |
| FP 3.4.2                                                                          | 0 | 0 | 1 | 6.2  | 0 | 0    | 0 | 0 | 0 | 0 | 0   |
| FP 3.4.3                                                                          | 0 | 0 | 0 | 0    | 0 | 0    | 0 | 0 | 0 | 1 | 2.9 |
| FP 3.4.4                                                                          | 0 | 0 | 1 | 6.2  | 0 | 0    | 0 | 0 | 0 | 3 | 8.8 |
| FP 3.4.5                                                                          | 0 | 0 | 1 | 6.7  | 0 | 0    | 0 | 0 | 0 | 3 | 9.4 |
| FP 3.4.6                                                                          | 0 | 0 | 1 | 6.2  | 0 | 0    | 0 | 0 | 0 | 1 | 2.9 |
| FP 3.4.7                                                                          | 0 | 0 | 0 | 0    | 0 | 0    | 0 | 0 | 0 | 1 | 2.9 |
| FP 3.5 FP Effort Influences ,À Special Populations: To what extent does the famil |   |   |   |      |   |      |   |   |   |   |     |
| Don't know                                                                        | 0 | 0 | 2 | 12.5 | 0 | 0    | 0 | 0 | 0 | 1 | 2.9 |
| FP 3.6 Social Marketing: Extent of coverage of the country by a social marketing  |   |   |   |      |   |      |   |   |   |   |     |
| Don't know                                                                        | 0 | 0 | 2 | 12.5 | 2 | 13.3 | 0 | 0 | 0 | 0 | 0   |
| FP 4.1 Strength of Observatory/Stakeholder/Technical Working Group for FP: Exten  |   |   |   |      |   |      |   |   |   |   |     |
| Don't know                                                                        | 0 | 0 | 1 | 6.2  | 0 | 0    | 0 | 0 | 0 | 1 | 3.1 |
| FP 4.2 Education/Research Strategy: Extent to which the national FP plan and/or   |   |   |   |      |   |      |   |   |   |   |     |
| Don't know                                                                        | 0 | 0 | 0 | 0    | 1 | 6.7  | 0 | 0 | 0 | 1 | 3.1 |
| FP 4.3 Data Gathering Partners:                                                   |   |   |   |      |   |      |   |   |   |   |     |
| FP 4.3.1                                                                          | 0 | 0 | 0 | 0    | 1 | 6.7  | 0 | 0 | 0 | 0 | 0   |
| FP 4.3.2                                                                          | 0 | 0 | 0 | 0    | 3 | 20   | 0 | 0 | 0 | 0 | 0   |

**Note:**

- For readability purpose, complete wording for questions/variables has been provided as Appendix 1.
- Only the percentages of respondents who responded “don’t know” to the respective question or sub-question was included in this table.
- Highlighted are values > 10%

|                                                                                    |   |   |   |     |   |      |   |   |   |   |   |      |
|------------------------------------------------------------------------------------|---|---|---|-----|---|------|---|---|---|---|---|------|
| FP 4.3.3                                                                           | 0 | 0 | 0 | 0   | 3 | 20   | 0 | 0 | 0 | 0 | 1 | 3.1  |
| FP 4.4 Topical Data Gathering:                                                     |   |   |   |     |   |      |   |   |   |   |   |      |
| FP 4.4.1                                                                           | 0 | 0 | 1 | 6.2 | 0 | 0    | 0 | 0 | 0 | 0 | 0 | 0    |
| FP 4.4.2                                                                           | 0 | 0 | 0 | 0   | 1 | 6.7  | 0 | 0 | 0 | 0 | 0 | 0    |
| FP 4.4.3                                                                           | 0 | 0 | 0 | 0   | 1 | 6.7  | 0 | 0 | 0 | 0 | 0 | 0    |
| FP 4.4.4                                                                           | 0 | 0 | 0 | 0   | 2 | 13.3 | 0 | 0 | 0 | 0 | 2 | 6.2  |
| FP 4.5 Quality/Coverage of Data: Extent to which current research/data is sex an   |   |   |   |     |   |      |   |   |   |   |   |      |
| FP 4.5.1                                                                           | 0 | 0 | 0 | 0   | 1 | 6.7  | 0 | 0 | 0 | 0 | 1 | 3.1  |
| FP 4.5.2                                                                           | 0 | 0 | 0 | 0   | 0 | 0    | 0 | 0 | 0 | 0 | 2 | 6.2  |
| FP 4.5.3                                                                           | 0 | 0 | 0 | 0   | 1 | 6.7  | 0 | 0 | 0 | 0 | 3 | 9.4  |
| FP 4.5.4                                                                           | 0 | 0 | 0 | 0   | 1 | 6.7  | 0 | 0 | 0 | 0 | 2 | 6.2  |
| FP 4.6 Record-Keeping: Extent to which systems for client recordkeeping, clinic    |   |   |   |     |   |      |   |   |   |   |   |      |
| Don't know                                                                         | 0 | 0 | 0 | 0   | 1 | 6.7  | 0 | 0 | 0 | 0 | 1 | 3.1  |
| FP 4.7 Quality Research Institutions: Extent to which the country supports and s   |   |   |   |     |   |      |   |   |   |   |   |      |
| Don't know                                                                         | 0 | 0 | 1 | 6.2 | 1 | 6.7  | 0 | 0 | 0 | 0 | 1 | 3.1  |
| FP 4.8 Evaluation: Extent to which program statistics, surveys, and small studie   |   |   |   |     |   |      |   |   |   |   |   |      |
| Don't know                                                                         | 0 | 0 | 1 | 6.2 | 2 | 13.3 | 0 | 0 | 0 | 0 | 4 | 12.5 |
| FP 4.9 Management, 's Use of Evaluation Findings: Extent to which local-level prog |   |   |   |     |   |      |   |   |   |   |   |      |
| Don't know                                                                         | 0 | 0 | 1 | 6.2 | 1 | 6.7  | 0 | 0 | 0 | 0 | 1 | 3.1  |

**Note:**

- For readability purpose, complete wording for questions/variables has been provided as Appendix 1.
- Only the percentages of respondents who responded "don't know" to the respective question or sub-question was included in this table.
- Highlighted are values > 10%

|                                                                                     |   |     |   |     |   |      |   |   |   |   |   |     |
|-------------------------------------------------------------------------------------|---|-----|---|-----|---|------|---|---|---|---|---|-----|
| FP 4.10 Ministerial Use of Evaluation Findings:<br>Extent to which the Ministry adm |   |     |   |     |   |      |   |   |   |   |   |     |
| Don't know                                                                          | 0 | 0   | 1 | 6.2 | 1 | 6.7  | 0 | 0 | 0 | 0 | 1 | 3.1 |
| FP 4.11 Dissemination of Information to Other<br>Implementing Bodies: Extent to whi |   |     |   |     |   |      |   |   |   |   |   |     |
| Don't know                                                                          | 0 | 0   | 1 | 6.2 | 0 | 0    | 0 | 0 | 0 | 0 | 1 | 3.1 |
| FP 5.1 CSO Actor Power: Extent to which CSO actors<br>are in strong placements with |   |     |   |     |   |      |   |   |   |   |   |     |
| Don't know                                                                          | 0 | 0   | 0 | 0   | 0 | 0    | 0 | 0 | 0 | 0 | 1 | 3.2 |
| FP 5.2 Budget Analysis as a CSO Tool: Extent to<br>which CSOs utilize budget analys |   |     |   |     |   |      |   |   |   |   |   |     |
| Don't know                                                                          | 1 | 6.7 | 1 | 6.2 | 0 | 0    | 0 | 0 | 0 | 0 | 1 | 3.2 |
| FP 5.3 Facility-Based Service Delivery Support:<br>Extent to which CSOs are involve |   |     |   |     |   |      |   |   |   |   |   |     |
| FP 5.4 Community-Based Service Delivery Support:<br>Extent to which CSOs participat |   |     |   |     |   |      |   |   |   |   |   |     |
| FP 5.5 Mobile Outreach for Community-Based<br>Service Delivery Support: Extent to w |   |     |   |     |   |      |   |   |   |   |   |     |
| Don't know                                                                          | 0 | 0   | 0 | 0   | 0 | 0    | 0 | 0 | 0 | 0 | 1 | 3.2 |
| FP 5.6 Social Franchising: Extent to which CSOs are<br>involved in social franchisi |   |     |   |     |   |      |   |   |   |   |   |     |
| Don't know                                                                          | 0 | 0   | 1 | 6.2 | 0 | 0    | 0 | 0 | 0 | 0 | 3 | 9.7 |
| FP 5.7 mHealth: Extent to which CSOs are leveraging<br>mHealth to utilize text mess |   |     |   |     |   |      |   |   |   |   |   |     |
| Don't know                                                                          | 0 | 0   | 0 | 0   | 2 | 13.3 | 0 | 0 | 0 | 0 | 2 | 6.5 |

**Note:**

- For readability purpose, complete wording for questions/variables has been provided as Appendix 1.
- Only the percentages of respondents who responded “don’t know” to the respective question or sub-question was included in this table.
- Highlighted are values > 10%



|                                                                                  |   |   |   |   |   |   |   |     |   |     |
|----------------------------------------------------------------------------------|---|---|---|---|---|---|---|-----|---|-----|
| FP 5.8 Human Rights and Quality of Care: Extent to which CSOs advocate for and s |   |   |   |   |   |   |   |     |   |     |
| FP 5.9 Social and Behavior Change (SBC): Extent to which CSOs support SBC interv |   |   |   |   |   |   |   |     |   |     |
| Don't know                                                                       | 0 | 0 | 0 | 0 | 0 | 0 | 0 | 0   | 2 | 6.5 |
| FP 5.10 Youth: Extent to which CSOs support FP policies, interventions and progr |   |   |   |   |   |   |   |     |   |     |
| Don't know                                                                       | 0 | 0 | 0 | 0 | 0 | 0 | 0 | 0   | 1 | 3.2 |
| FP 5.11 Programming for Men: Extent to which CSOs support FP policies, intervent |   |   |   |   |   |   |   |     |   |     |
| Don't know                                                                       | 0 | 0 | 0 | 0 | 0 | 0 | 0 | 0   | 2 | 6.5 |
| FP 5.12 Advocacy/Accountability: Extent to which CSOs support the training and c |   |   |   |   |   |   |   |     |   |     |
| Don't know                                                                       | 0 | 0 | 0 | 0 | 0 | 0 | 0 | 0   | 1 | 3.2 |
| FP 5.13 CSO-Led Assessment and Monitoring: Extent to which CSOs assess, monitor  |   |   |   |   |   |   |   |     |   |     |
| Don't know                                                                       | 0 | 0 | 0 | 0 | 0 | 0 | 0 | 0   | 3 | 9.7 |
| FP 5.14 Forming Partnerships between CSOs: Extent to which CSOs have formed nati |   |   |   |   |   |   |   |     |   |     |
| Don't know                                                                       | 0 | 0 | 0 | 0 | 0 | 0 | 0 | 0   | 2 | 6.5 |
| MCH 1.1 Adequate Policy: Ministry of Health policies toward pregnancy and delive |   |   |   |   |   |   |   |     |   |     |
| Don't know                                                                       | 0 | 0 | 0 | 0 | 0 | 0 | 1 | 5.9 | 0 | 0   |
| Don't know                                                                       | 0 | 0 | 0 | 0 | 0 | 0 | 1 | 5.9 | 0 | 0   |
| MCH 1.2 Universal Access: Extent to which there are constitutional and legal ent |   |   |   |   |   |   |   |     |   |     |

**Note:**

- For readability purpose, complete wording for questions/variables has been provided as Appendix 1.
- Only the percentages of respondents who responded “don’t know” to the respective question or sub-question was included in this table.
- Highlighted are values > 10%

|                                                                                                                        |   |     |   |      |   |   |   |   |     |   |      |
|------------------------------------------------------------------------------------------------------------------------|---|-----|---|------|---|---|---|---|-----|---|------|
| Don't know                                                                                                             | 0 | 0   | 0 | 0    | 0 | 0 | 0 | 1 | 5.9 | 0 | 0    |
| MCH 1.3 Multisector Involvement: Extent to which policies are developed through                                        |   |     |   |      |   |   |   |   |     |   |      |
| Don't know                                                                                                             | 0 | 0   | 0 | 0    | 0 | 0 | 0 | 1 | 5.9 | 0 | 0    |
| MCH 1.4 Competent Service Providers: Extent to which policies are reasonable and                                       |   |     |   |      |   |   |   |   |     |   |      |
| Don't know                                                                                                             | 0 | 0   | 0 | 0    | 0 | 0 | 0 | 1 | 5.9 | 0 | 0    |
| MCH 1.5 Abortion Legislation: Extent to which a favorable policy exists towards                                        |   |     |   |      |   |   |   |   |     |   |      |
| Don't know                                                                                                             | 0 | 0   | 1 | 5.6  | 0 | 0 | 0 | 1 | 5.9 | 2 | 10.5 |
| MCH 1.6. Post-Abortion Care Legislation: Extent to which a favorable policy exists                                     |   |     |   |      |   |   |   |   |     |   |      |
| Don't know                                                                                                             | 0 | 0   | 4 | 22.2 | 0 | 0 | 0 | 1 | 5.9 | 2 | 10.5 |
| MCH 1.7 Policy Reviews and Updates: Extent to which policies are regularly reviewed                                    |   |     |   |      |   |   |   |   |     |   |      |
| Don't know                                                                                                             | 0 | 0   | 2 | 11.1 | 0 | 0 | 0 | 1 | 5.9 | 0 | 0    |
| MCH 1.8 High-Level Actor Placement: Extent and level to which the director of maternal and child health is involved in |   |     |   |      |   |   |   |   |     |   |      |
| Don't know                                                                                                             | 0 | 0   | 4 | 22.2 | 0 | 0 | 0 | 1 | 5.9 | 1 | 5.3  |
| MCH 1.9 Financing for MCH: Extent to which the government budgets for safe pregnancy and family planning               |   |     |   |      |   |   |   |   |     |   |      |
| Don't know                                                                                                             | 1 | 6.7 | 0 | 0    | 0 | 0 | 0 | 1 | 5.9 | 2 | 10.5 |
| MCH 1.10 Affordability: Extent to which all MCH-related services and drugs are affordable                              |   |     |   |      |   |   |   |   |     |   |      |
| Don't know                                                                                                             | 0 | 0   | 0 | 0    | 0 | 0 | 0 | 1 | 5.9 | 0 | 0    |

**Note:**

- For readability purpose, complete wording for questions/variables has been provided as Appendix 1.
- Only the percentages of respondents who responded “don’t know” to the respective question or sub-question was included in this table.
- Highlighted are values > 10%

|                                                                                             |   |     |   |             |   |   |   |   |     |   |             |
|---------------------------------------------------------------------------------------------|---|-----|---|-------------|---|---|---|---|-----|---|-------------|
| MCH 1.11 Private Sector: Extent to which the private sector (doctors, midwives, Don't know  | 0 | 0   | 0 | 0           | 0 | 0 | 0 | 1 | 5.9 | 1 | 5.3         |
| MCH 1.12 MCH Department: Extent to which the Ministry of Health has a department Don't know | 0 | 0   | 1 | 5.6         | 0 | 0 | 0 | 1 | 5.9 | 0 | 0           |
| MCH 1.13 Potential Solutions: Extent to which the government recognizes potentialia         |   |     |   |             |   |   |   |   |     |   |             |
| MCH 1.13.1                                                                                  | 1 | 6.7 | 1 | 5.6         | 0 | 0 | 0 | 1 | 5.9 | 0 | 0           |
| MCH 1.13.2                                                                                  | 0 | 0   | 1 | 5.9         | 0 | 0 | 0 | 1 | 5.9 | 0 | 0           |
| MCH 1.13.3                                                                                  | 0 | 0   | 2 | <b>11.1</b> | 0 | 0 | 0 | 1 | 5.9 | 0 | 0           |
| MCH 1.13.4                                                                                  | 0 | 0   | 1 | 5.6         | 0 | 0 | 0 | 1 | 5.9 | 0 | 0           |
| MCH 1.13.5                                                                                  | 0 | 0   | 1 | 5.6         | 0 | 0 | 0 | 1 | 5.9 | 0 | 0           |
| MCH 2.1 Obstetric Care Availability ,Ä All Centers: Extent to which all primary h           |   |     |   |             |   |   |   |   |     |   |             |
| MCH 2.1.2                                                                                   | 0 | 0   | 1 | 6.2         | 0 | 0 | 0 | 1 | 6.2 | 1 | 5.9         |
| MCH 2.1.3                                                                                   | 1 | 7.7 | 2 | <b>12.5</b> | 0 | 0 | 0 | 1 | 6.2 | 1 | 5.9         |
| MCH 2.1.4                                                                                   | 1 | 7.7 | 2 | <b>12.5</b> | 0 | 0 | 0 | 1 | 6.2 | 1 | 5.9         |
| MCH 2.1.5                                                                                   | 1 | 8.3 | 2 | <b>12.5</b> | 0 | 0 | 0 | 1 | 6.2 | 2 | <b>11.8</b> |
| MCH 2.1.6                                                                                   | 1 | 7.7 | 0 | 0           | 0 | 0 | 0 | 1 | 6.2 | 1 | 5.9         |
| MCH 2.1.7                                                                                   | 0 | 0   | 1 | 6.2         | 0 | 0 | 0 | 1 | 6.2 | 0 | 0           |
| MCH 2.1.8                                                                                   | 0 | 0   | 0 | 0           | 0 | 0 | 0 | 1 | 6.2 | 0 | 0           |
| MCH 2.2 Obstetric Care Availability ,Ä Secondary Healthcare Facilities: Extent to           |   |     |   |             |   |   |   |   |     |   |             |
| MCH 2.2.1                                                                                   | 0 | 0   | 0 | 0           | 0 | 0 | 0 | 1 | 6.2 | 1 | 5.9         |

**Note:**

- For readability purpose, complete wording for questions/variables has been provided as Appendix 1.
- Only the percentages of respondents who responded “don’t know” to the respective question or sub-question was included in this table.
- Highlighted are values > 10%

|                                                                                  |   |     |   |             |   |             |   |   |   |     |   |             |
|----------------------------------------------------------------------------------|---|-----|---|-------------|---|-------------|---|---|---|-----|---|-------------|
| MCH 2.2.2                                                                        | 1 | 8.3 | 0 | 0           | 0 | 0           | 0 | 0 | 1 | 6.2 | 3 | <b>17.6</b> |
| MCH 2.2.3                                                                        | 0 | 0   | 1 | 6.2         | 0 | 0           | 0 | 0 | 1 | 6.2 | 1 | 6.7         |
| MCH 2.3 Pregnancy-Related Services: Extent to which all pregnant women have adeq |   |     |   |             |   |             |   |   |   |     |   |             |
| MCH 2.3.1                                                                        | 1 | 7.7 | 1 | 6.2         | 0 | 0           | 0 | 0 | 1 | 6.2 | 2 | <b>11.8</b> |
| MCH 2.3.2                                                                        | 1 | 7.7 | 0 | 0           | 0 | 0           | 0 | 0 | 1 | 6.2 | 2 | <b>11.8</b> |
| MCH 2.3.3                                                                        | 1 | 7.7 | 1 | 6.2         | 0 | 0           | 0 | 0 | 1 | 6.2 | 2 | <b>11.8</b> |
| MCH 2.3.4                                                                        | 1 | 7.7 | 1 | 6.2         | 0 | 0           | 0 | 0 | 1 | 6.2 | 1 | 6.2         |
| MCH 2.3.5                                                                        | 1 | 7.7 | 1 | 6.2         | 0 | 0           | 0 | 0 | 1 | 6.2 | 1 | 5.9         |
| MCH 2.3.6                                                                        | 0 | 0   | 1 | 6.2         | 0 | 0           | 0 | 0 | 1 | 6.2 | 1 | 6.7         |
| MCH 2.3.7                                                                        | 0 | 0   | 1 | 6.2         | 0 | 0           | 0 | 0 | 1 | 6.2 | 0 | 0           |
| MCH 2.3.8                                                                        | 0 | 0   | 0 | 0           | 0 | 0           | 0 | 0 | 1 | 6.2 | 0 | 0           |
| MCH 2.3.9                                                                        | 1 | 7.7 | 1 | 6.7         | 0 | 0           | 0 | 0 | 1 | 6.2 | 2 | <b>12.5</b> |
| MCH 2.4 Ante-natal Care for Unmarried and HIV Positive Women: Extent to which, a |   |     |   |             |   |             |   |   |   |     |   |             |
| MCH 2.4.1                                                                        | 0 | 0   | 1 | 6.2         | 1 | <b>12.5</b> | 0 | 0 | 1 | 6.2 | 3 | <b>17.6</b> |
| MCH 2.4.2                                                                        | 1 | 7.7 | 1 | 6.2         | 1 | <b>12.5</b> | 0 | 0 | 1 | 6.2 | 3 | <b>17.6</b> |
| MCH 2.4.3                                                                        | 0 | 0   | 2 | <b>12.5</b> | 0 | 0           | 0 | 0 | 1 | 6.2 | 3 | <b>17.6</b> |
| MCH 2.4.4                                                                        | 0 | 0   | 1 | 6.7         | 0 | 0           | 0 | 0 | 1 | 6.2 | 1 | 5.9         |
| MCH 2.5 Newborn Care: Extent to which, for newborn care, all infants whether del |   |     |   |             |   |             |   |   |   |     |   |             |
| MCH 2.5.1                                                                        | 1 | 7.7 | 2 | <b>12.5</b> | 0 | 0           | 0 | 0 | 1 | 6.2 | 3 | <b>17.6</b> |
| MCH 2.5.2                                                                        | 1 | 7.7 | 2 | <b>12.5</b> | 0 | 0           | 0 | 0 | 1 | 6.2 | 3 | <b>17.6</b> |
| MCH 2.5.3                                                                        | 0 | 0   | 1 | 6.2         | 0 | 0           | 0 | 0 | 1 | 6.2 | 0 | 0           |
| MCH 2.5.4                                                                        | 0 | 0   | 2 | <b>12.5</b> | 0 | 0           | 0 | 0 | 1 | 6.2 | 1 | 5.9         |

**Note:**

- For readability purpose, complete wording for questions/variables has been provided as Appendix 1.
- Only the percentages of respondents who responded “don’t know” to the respective question or sub-question was included in this table.
- Highlighted are values > 10%

|                                                                                    |   |     |   |      |   |      |   |   |   |     |   |      |
|------------------------------------------------------------------------------------|---|-----|---|------|---|------|---|---|---|-----|---|------|
| MCH 2.5.5                                                                          | 1 | 7.7 | 3 | 18.8 | 0 | 0    | 0 | 0 | 1 | 6.2 | 3 | 17.6 |
| MCH 2.5.6                                                                          | 0 | 0   | 1 | 6.2  | 0 | 0    | 0 | 0 | 1 | 6.2 | 0 | 0    |
| MCH 2.5.7                                                                          | 0 | 0   | 1 | 6.2  | 0 | 0    | 0 | 0 | 1 | 6.2 | 0 | 0    |
| MCH 2.6 Family Planning ,Äi All Centers: Extent to which there exists proper provi |   |     |   |      |   |      |   |   |   |     |   |      |
| MCH 2.6.1                                                                          | 0 | 0   | 0 | 0    | 1 | 12.5 | 0 | 0 | 1 | 6.2 | 1 | 5.9  |
| MCH 2.6.2                                                                          | 0 | 0   | 1 | 6.2  | 0 | 0    | 0 | 0 | 1 | 6.2 | 0 | 0    |
| MCH 2.6.3                                                                          | 0 | 0   | 2 | 12.5 | 0 | 0    | 0 | 0 | 1 | 6.2 | 0 | 0    |
| MCH 2.6.4                                                                          | 0 | 0   | 1 | 6.2  | 0 | 0    | 0 | 0 | 1 | 6.2 | 0 | 0    |
| MCH 2.6.5                                                                          | 0 | 0   | 1 | 6.7  | 0 | 0    | 0 | 0 | 1 | 6.2 | 0 | 0    |
| MCH 2.7 Family Planning ,Äi District/Sub-county Hospitals: Extent to which there e |   |     |   |      |   |      |   |   |   |     |   |      |
| MCH 2.7.1                                                                          | 1 | 7.7 | 1 | 6.2  | 1 | 12.5 | 0 | 0 | 1 | 6.2 | 1 | 5.9  |
| MCH 2.7.2                                                                          | 1 | 7.7 | 1 | 6.7  | 0 | 0    | 0 | 0 | 1 | 6.2 | 0 | 0    |
| MCH 2.7.3                                                                          | 0 | 0   | 1 | 6.2  | 0 | 0    | 0 | 0 | 1 | 6.2 | 0 | 0    |
| MCH 2.7.4                                                                          | 0 | 0   | 2 | 12.5 | 0 | 0    | 0 | 0 | 1 | 6.2 | 0 | 0    |
| MCH 2.7.5                                                                          | 0 | 0   | 1 | 6.2  | 1 | 12.5 | 0 | 0 | 1 | 6.2 | 2 | 12.5 |
| MCH 2.7.6                                                                          | 0 | 0   | 2 | 12.5 | 1 | 12.5 | 0 | 0 | 1 | 6.2 | 2 | 11.8 |
| MCH 2.7.7                                                                          | 0 | 0   | 1 | 6.2  | 0 | 0    | 0 | 0 | 1 | 6.2 | 0 | 0    |
| MCH 2.8 Childhood Illness: Extent to which the WHO-recommended case management o   |   |     |   |      |   |      |   |   |   |     |   |      |
| MCH 2.8.1                                                                          | 0 | 0   | 1 | 6.7  | 1 | 12.5 | 0 | 0 | 1 | 6.2 | 1 | 5.9  |
| MCH 2.8.2                                                                          | 0 | 0   | 1 | 6.2  | 0 | 0    | 0 | 0 | 1 | 6.7 | 1 | 5.9  |
| MCH 3.1 Government Messages: Extent to which high officials in the government, i   |   |     |   |      |   |      |   |   |   |     |   |      |

**Note:**

- For readability purpose, complete wording for questions/variables has been provided as Appendix 1.
- Only the percentages of respondents who responded “don’t know” to the respective question or sub-question was included in this table.
- Highlighted are values > 10%

|                                                                                  |   |     |   |     |   |      |   |   |      |     |     |     |
|----------------------------------------------------------------------------------|---|-----|---|-----|---|------|---|---|------|-----|-----|-----|
| Don't know                                                                       | 0 | 0   | 0 | 0   | 0 | 0    | 0 | 1 | 6.2  | 0   | 0   |     |
| MCH 3.2 Mass Media: Extent to which the national program uses the mass media to  |   |     |   |     |   |      |   |   |      |     |     |     |
| Don't know                                                                       | 0 | 0   | 0 | 0   | 0 | 0    | 0 | 1 | 6.2  | 0   | 0   |     |
| MCH 3.3 Community-Level Media: Extent to which community groups take part in sys |   |     |   |     |   |      |   |   |      |     |     |     |
| Don't know                                                                       | 0 | 0   | 0 | 0   | 0 | 0    | 0 | 1 | 6.2  | 0   | 0   |     |
| MCH 3.4 Educational Materials: Extent to which the appropriate ministry (MOH) su |   |     |   |     |   |      |   |   |      |     |     |     |
| Don't know                                                                       | 1 | 7.7 | 0 | 0   | 0 | 0    | 0 | 1 | 6.2  | 0   | 0   |     |
| MCH 3.5 Self-Review of Maternal Mortality Cases: Extent to which each health fac |   |     |   |     |   |      |   |   |      |     |     |     |
| Don't know                                                                       | 0 | 0   | 1 | 8.3 | 0 | 0    | 0 | 1 | 6.2  | 1   | 6.7 |     |
| MCH 3.6 Informing Policies with New Evidence: Extent to which each health facili |   |     |   |     |   |      |   |   |      |     |     |     |
| Don't know                                                                       | 0 | 0   | 1 | 8.3 | 0 | 0    | 0 | 1 | 6.2  | 0   | 0   |     |
| MCH 4.1 Strength of Observatory/Stakeholder/Technical Working Group for MCH: Ext |   |     |   |     |   |      |   |   |      |     |     |     |
| MCH 4.1.1                                                                        | 0 | 0   | 0 | 0   | 1 | 12.5 | 0 | 0 | 1    | 6.2 | 0   | 0   |
| MCH 4.1.2                                                                        | 0 | 0   | 1 | 8.3 | 0 | 0    | 0 | 0 | 1    | 6.2 | 1   | 7.7 |
| MCH 4.1.3                                                                        | 0 | 0   | 0 | 0   | 0 | 0    | 0 | 0 | 1    | 6.2 | 1   | 7.1 |
| MCH 4.2 MCH Research Strategy: Extent to which national documents include a comp |   |     |   |     |   |      |   |   |      |     |     |     |
| Don't know                                                                       | 0 | 0   | 0 | 0   | 0 | 0    | 0 | 3 | 18.8 | 1   | 7.1 |     |
| MCH 4.3 Data-Gathering Partners:                                                 |   |     |   |     |   |      |   |   |      |     |     |     |

**Note:**

- For readability purpose, complete wording for questions/variables has been provided as Appendix 1.
- Only the percentages of respondents who responded “don’t know” to the respective question or sub-question was included in this table.
- Highlighted are values > 10%

|                                                                                  |   |   |   |      |   |      |   |   |   |     |   |      |
|----------------------------------------------------------------------------------|---|---|---|------|---|------|---|---|---|-----|---|------|
| MCH 4.3.1                                                                        | 0 | 0 | 1 | 8.3  | 0 | 0    | 0 | 0 | 1 | 6.2 | 1 | 7.1  |
| MCH 4.3.2                                                                        | 0 | 0 | 2 | 16.7 | 0 | 0    | 0 | 0 | 1 | 6.2 | 1 | 7.1  |
| MCH 4.3.3                                                                        | 0 | 0 | 1 | 9.1  | 1 | 12.5 | 0 | 0 | 1 | 6.2 | 1 | 7.7  |
| MCH 4.4 Topical Research:                                                        |   |   |   |      |   |      |   |   |   |     |   |      |
| MCH 4.4.1                                                                        | 0 | 0 | 2 | 16.7 | 1 | 12.5 | 0 | 0 | 1 | 6.2 | 1 | 7.1  |
| MCH 4.4.2                                                                        | 0 | 0 | 1 | 9.1  | 1 | 12.5 | 0 | 0 | 1 | 6.2 | 1 | 7.1  |
| MCH 4.4.3                                                                        | 0 | 0 | 1 | 8.3  | 1 | 12.5 | 0 | 0 | 1 | 6.2 | 1 | 7.1  |
| MCH 4.4.4                                                                        | 0 | 0 | 4 | 33.3 | 1 | 12.5 | 0 | 0 | 1 | 6.2 | 1 | 7.1  |
| MCH 4.5 Quality/Coverage of Data: Extent to which current research/data is disag |   |   |   |      |   |      |   |   |   |     |   |      |
| MCH 4.5.1                                                                        | 0 | 0 | 2 | 16.7 | 0 | 0    | 0 | 0 | 1 | 6.2 | 1 | 7.1  |
| MCH 4.5.2                                                                        | 0 | 0 | 1 | 8.3  | 0 | 0    | 0 | 0 | 1 | 6.2 | 1 | 7.1  |
| MCH 4.5.3                                                                        | 0 | 0 | 2 | 16.7 | 0 | 0    | 0 | 0 | 1 | 6.2 | 1 | 7.1  |
| MCH 4.5.4                                                                        | 0 | 0 | 2 | 16.7 | 0 | 0    | 0 | 0 | 1 | 6.2 | 2 | 14.3 |
| MCH 4.5.5                                                                        | 0 | 0 | 3 | 25   | 0 | 0    | 0 | 0 | 1 | 6.2 | 2 | 14.3 |
| MCH 4.6 Record-Keeping: Extent to which systems for client recordkeeping, clinic |   |   |   |      |   |      |   |   |   |     |   |      |
| Don't know                                                                       | 0 | 0 | 1 | 8.3  | 0 | 0    | 0 | 0 | 1 | 6.2 | 1 | 7.1  |
| MCH 4.7 Quality Research Institutions: Extent to which the country has the capac |   |   |   |      |   |      |   |   |   |     |   |      |
| Don't know                                                                       | 0 | 0 | 1 | 8.3  | 0 | 0    | 0 | 0 | 1 | 6.2 | 1 | 7.1  |
| MCH 4.8 Evaluation: Extent to which program statistics, surveys, and small studi |   |   |   |      |   |      |   |   |   |     |   |      |
| Don't know                                                                       | 0 | 0 | 1 | 8.3  | 0 | 0    | 0 | 0 | 1 | 6.2 | 1 | 7.1  |

**Note:**

- For readability purpose, complete wording for questions/variables has been provided as Appendix 1.
- Only the percentages of respondents who responded “don’t know” to the respective question or sub-question was included in this table.
- Highlighted are values > 10%

|                                                                                  |   |           |   |             |   |   |   |   |   |     |   |             |
|----------------------------------------------------------------------------------|---|-----------|---|-------------|---|---|---|---|---|-----|---|-------------|
| MCH 4.9 Management, Use of Evaluation Findings: Extent to which local-level pro  |   |           |   |             |   |   |   |   |   |     |   |             |
| Don't know                                                                       | 0 | 0         | 1 | 8.3         | 0 | 0 | 0 | 0 | 1 | 6.2 | 2 | <b>14.3</b> |
| MCH 4.10 Ministerial Use of Evaluation Findings: Extent to which the Ministry ad |   |           |   |             |   |   |   |   |   |     |   |             |
| Don't know                                                                       | 0 | 0         | 1 | 8.3         | 0 | 0 | 0 | 0 | 1 | 6.2 | 1 | 7.1         |
| MCH 4.11 Dissemination of Information to Other Implementing Bodies: Extent to wh |   |           |   |             |   |   |   |   |   |     |   |             |
| Don't know                                                                       | 0 | 0         | 2 | <b>16.7</b> | 0 | 0 | 0 | 0 | 1 | 6.2 | 1 | 7.1         |
| MCH 5.1 CSO Actor Power: Extent to which CSO actors are in strong placements wit |   |           |   |             |   |   |   |   |   |     |   |             |
| Don't know                                                                       | 0 | 0         | 1 | 10          | 0 | 0 | 0 | 0 | 1 | 6.7 | 2 | <b>14.3</b> |
| MCH 5.2 Budget Analysis as a CSO Tool: Extent to which CSOs utilize budget analy |   |           |   |             |   |   |   |   |   |     |   |             |
| Don't know                                                                       | 2 | <b>20</b> | 1 | 10          | 0 | 0 | 0 | 0 | 1 | 6.7 | 3 | <b>21.4</b> |
| MCH 5.3 Facility-Based Service Delivery Support: Extent to which CSOs are involv |   |           |   |             |   |   |   |   |   |     |   |             |
| Don't know                                                                       | 0 | 0         | 0 | 0           | 0 | 0 | 0 | 0 | 1 | 6.7 | 1 | 7.1         |
| MCH 5.4 Community-Based Service Delivery Support: Extent to which CSOs participa |   |           |   |             |   |   |   |   |   |     |   |             |
| Don't know                                                                       | 0 | 0         | 0 | 0           | 0 | 0 | 0 | 0 | 1 | 6.7 | 1 | 7.1         |
| MCH 5.5 Mobile Outreach for Community-Based Service Delivery Support: Extent to  |   |           |   |             |   |   |   |   |   |     |   |             |
| Don't know                                                                       | 0 | 0         | 0 | 0           | 0 | 0 | 0 | 0 | 1 | 6.7 | 1 | 7.1         |
| MCH 5.6 Social Franchising: Extent to which CSOs are involved with social franch |   |           |   |             |   |   |   |   |   |     |   |             |

**Note:**

- For readability purpose, complete wording for questions/variables has been provided as Appendix 1.
- Only the percentages of respondents who responded “don’t know” to the respective question or sub-question was included in this table.
- Highlighted are values > 10%



|                                                                                  |   |           |   |           |   |             |   |   |   |     |   |             |
|----------------------------------------------------------------------------------|---|-----------|---|-----------|---|-------------|---|---|---|-----|---|-------------|
| Don't know                                                                       | 0 | 0         | 0 | 0         | 0 | 0           | 0 | 0 | 1 | 6.7 | 2 | <b>14.3</b> |
| MCH 5.7 mHealth: Extent to which CSOs are leveraging mHealth to utilize text mes |   |           |   |           |   |             |   |   |   |     |   |             |
| Don't know                                                                       | 0 | 0         | 1 | 10        | 0 | 0           | 0 | 0 | 1 | 6.7 | 2 | <b>14.3</b> |
| MCH 5.8 Human Rights and Quality of Care: Extent to which CSOs advocate for and  |   |           |   |           |   |             |   |   |   |     |   |             |
| Don't know                                                                       | 0 | 0         | 1 | 10        | 0 | 0           | 0 | 0 | 1 | 6.7 | 2 | <b>14.3</b> |
| MCH 5.9 Social and Behavior Change (SBC): Extent to which CSOs support SBC inter |   |           |   |           |   |             |   |   |   |     |   |             |
| Don't know                                                                       | 0 | 0         | 1 | 10        | 0 | 0           | 0 | 0 | 1 | 6.7 | 1 | 7.1         |
| MCH 5.10 Advocacy/Accountability: Extent to which CSOs support the training and  |   |           |   |           |   |             |   |   |   |     |   |             |
| Don't know                                                                       | 0 | 0         | 0 | 0         | 0 | 0           | 0 | 0 | 1 | 6.7 | 1 | 7.1         |
| MCH 5.11 CSO-Led Assessment and Monitoring: Extent to which CSOs assess, monitor |   |           |   |           |   |             |   |   |   |     |   |             |
| Don't know                                                                       | 0 | 0         | 0 | 0         | 0 | 0           | 0 | 0 | 1 | 6.7 | 1 | 7.1         |
| MCH 5.12 Forming Partnerships between CSOs: Extent to which CSOs have formed nat |   |           |   |           |   |             |   |   |   |     |   |             |
| Don't know                                                                       | 1 | 10        | 1 | 10        | 0 | 0           | 0 | 0 | 1 | 6.7 | 2 | <b>14.3</b> |
| ED 1.1 Quality: Extent to which there are national plans/strategies/programs to  |   |           |   |           |   |             |   |   |   |     |   |             |
| ED 1.2 Disadvantaged Groups:                                                     |   |           |   |           |   |             |   |   |   |     |   |             |
| Don't know                                                                       | 3 | <b>20</b> | 0 | 0         | 2 | <b>18.2</b> | 0 | 0 | 0 | 0   | 0 | 0           |
| Don't know                                                                       | 1 | 6.7       | 1 | <b>20</b> | 0 | 0           | 0 | 0 | 0 | 0   | 0 | 0           |
| ED 1.3 Teachers: Extent to which teacher recruitment, development and management |   |           |   |           |   |             |   |   |   |     |   |             |

**Note:**

- For readability purpose, complete wording for questions/variables has been provided as Appendix 1.
- Only the percentages of respondents who responded “don’t know” to the respective question or sub-question was included in this table.
- Highlighted are values > 10%

|                                                                                  |   |      |   |   |   |      |      |   |   |   |   |
|----------------------------------------------------------------------------------|---|------|---|---|---|------|------|---|---|---|---|
| ED 1.4 Teachers' Accountability: Extent to which national plans include specific |   |      |   |   |   |      |      |   |   |   |   |
| Don't know                                                                       | 1 | 6.7  | 0 | 0 | 0 | 0    | 0    | 0 | 0 | 0 | 0 |
| ED 1.5 Teacher Quality: Extent to which education policies/strategies/programs i |   |      |   |   |   |      |      |   |   |   |   |
| Don't know                                                                       | 1 | 6.7  | 0 | 0 | 0 | 0    | 0    | 0 | 0 | 0 | 0 |
| ED 1.6 Collaboration in Education: Extent to which the policy makes provisions t |   |      |   |   |   |      |      |   |   |   |   |
| ED 1.7 Gender Parity SDG: Extent to which national policies/plans/strategies con |   |      |   |   |   |      |      |   |   |   |   |
| Don't know                                                                       | 1 | 6.7  | 0 | 0 | 0 | 0    | 0    | 0 | 0 | 0 | 0 |
| ED 1.8 Education Financing: Extent to which new education plans include financin |   |      |   |   |   |      |      |   |   |   |   |
| Don't know                                                                       | 2 | 13.3 | 0 | 0 | 0 | 0    | 0    | 0 | 0 | 0 | 0 |
| ED 1.9 Gender Parity Planning: Extent to which there are national plans/strategi |   |      |   |   |   |      |      |   |   |   |   |
| ED 1.9.1                                                                         | 0 | 0    | 0 | 0 | 0 | 1    | 14.3 | 0 | 0 | 0 | 0 |
| ED 1.9.2                                                                         | 0 | 0    | 0 | 0 | 0 | 1    | 14.3 | 0 | 0 | 0 | 0 |
| ED 1.9.3                                                                         | 0 | 0    | 0 | 0 | 3 | 27.3 | 0    | 0 | 0 | 0 | 0 |
| ED 1.10 Adult Illiteracy: Extent to which national policies/plans/strategies aim |   |      |   |   |   |      |      |   |   |   |   |
| ED 1.10.1                                                                        | 2 | 13.3 | 0 | 0 | 1 | 8.3  | 0    | 0 | 0 | 0 | 0 |
| ED 1.10.2                                                                        | 2 | 13.3 | 0 | 0 | 1 | 8.3  | 0    | 0 | 0 | 0 | 0 |
| ED 1.11 Out-of-School Children: Extent to which policies address the plight of o |   |      |   |   |   |      |      |   |   |   |   |
| Don't know                                                                       | 1 | 6.7  | 0 | 0 | 0 | 0    | 0    | 0 | 0 | 0 | 0 |

**Note:**

- For readability purpose, complete wording for questions/variables has been provided as Appendix 1.
- Only the percentages of respondents who responded "don't know" to the respective question or sub-question was included in this table.
- Highlighted are values > 10%

|                                                                                   |   |      |   |    |   |     |   |   |   |   |   |
|-----------------------------------------------------------------------------------|---|------|---|----|---|-----|---|---|---|---|---|
| ED 1.12 Technology Integration: Extent to which strategies have been developed a  |   |      |   |    |   |     |   |   |   |   |   |
| ED 1.13. Technology Literacy: Extent to which resources have been allocated to i  |   |      |   |    |   |     |   |   |   |   |   |
| ED 2.1 Teacher Deployment: Extent to which strategies/plans are used to ensure t  |   |      |   |    |   |     |   |   |   |   |   |
| Don't know                                                                        | 2 | 13.3 | 0 | 0  | 0 | 0   | 0 | 0 | 0 | 0 | 0 |
| ED 2.2 Teacher Quality: Extent to which teacher quality is recognized as a key f  |   |      |   |    |   |     |   |   |   |   |   |
| Don't know                                                                        | 0 | 0    | 1 | 20 | 0 | 0   | 0 | 0 | 0 | 0 | 0 |
| ED 2.3 Gender Parity: –†Extent to which resources have been utilized to improve e |   |      |   |    |   |     |   |   |   |   |   |
| Don't know                                                                        | 1 | 6.7  | 0 | 0  | 0 | 0   | 0 | 0 | 0 | 0 | 0 |
| ED 2.4 Parental Involvement in Education: Extent to which parents are involved i  |   |      |   |    |   |     |   |   |   |   |   |
| ED 2.5 Standardized Assessments: Extent to which all schools utilize standardize  |   |      |   |    |   |     |   |   |   |   |   |
| Don't know                                                                        | 2 | 13.3 | 0 | 0  | 0 | 0   | 0 | 0 | 0 | 0 | 0 |
| ED 2.6. Use of Assessment to Inform Progress: Extent to which adjustments to sch  |   |      |   |    |   |     |   |   |   |   |   |
| Don't know                                                                        | 2 | 13.3 | 0 | 0  | 1 | 8.3 | 0 | 0 | 0 | 0 | 0 |
| ED 3.1 Equality: Extent to which equity and equality in education have been high  |   |      |   |    |   |     |   |   |   |   |   |
| ED 3.2 Quality: Extent to which quality of education takes part in advocacy-rela  |   |      |   |    |   |     |   |   |   |   |   |
| Don't know                                                                        | 1 | 7.1  | 0 | 0  | 0 | 0   | 0 | 0 | 0 | 0 | 0 |

**Note:**

- For readability purpose, complete wording for questions/variables has been provided as Appendix 1.
- Only the percentages of respondents who responded “don’t know” to the respective question or sub-question was included in this table.
- Highlighted are values > 10%

|                                                                                   |   |      |   |    |   |     |   |   |   |   |   |
|-----------------------------------------------------------------------------------|---|------|---|----|---|-----|---|---|---|---|---|
| ED 3.3 Teachers, "Obstacles: Extent to which the needs of teachers have been high |   |      |   |    |   |     |   |   |   |   |   |
| ED 3.4 Institutions, "Obstacles: Extent to which the challenges of educational in |   |      |   |    |   |     |   |   |   |   |   |
| ED 4.1 Strength of Observatory/Stakeholder/Technical Working Group for ED: Exten  |   |      |   |    |   |     |   |   |   |   |   |
| ED 4.1.1                                                                          | 2 | 14.3 | 1 | 20 | 0 | 0   | 0 | 0 | 0 | 0 | 0 |
| ED 4.1.2                                                                          | 2 | 16.7 | 0 | 0  | 1 | 8.3 | 0 | 0 | 0 | 0 | 0 |
| ED 4.1.3                                                                          | 2 | 15.4 | 0 | 0  | 0 | 0   | 0 | 0 | 0 | 0 | 0 |
| ED 4.2 Education/Research Strategy: Extent to which the national education plan   |   |      |   |    |   |     |   |   |   |   |   |
| Don't know                                                                        | 1 | 7.1  | 0 | 0  | 1 | 8.3 | 0 | 0 | 0 | 0 | 0 |
| ED 4.3 Data Gathering Partners:                                                   |   |      |   |    |   |     |   |   |   |   |   |
| ED 4.3.1                                                                          | 1 | 7.1  | 0 | 0  | 0 | 0   | 0 | 0 | 0 | 0 | 0 |
| ED 4.3.2                                                                          | 1 | 7.1  | 0 | 0  | 1 | 9.1 | 0 | 0 | 0 | 0 | 0 |
| ED 4.3.3                                                                          | 0 | 0    | 0 | 0  | 1 | 8.3 | 0 | 0 | 0 | 0 | 0 |
| ED 4.4 Topical Research:                                                          |   |      |   |    |   |     |   |   |   |   |   |
| ED 4.4.1                                                                          | 0 | 0    | 0 | 0  | 1 | 8.3 | 0 | 0 | 0 | 0 | 0 |
| ED 4.4.2                                                                          | 0 | 0    | 0 | 0  | 1 | 8.3 | 0 | 0 | 0 | 0 | 0 |
| ED 4.4.3                                                                          | 0 | 0    | 0 | 0  | 1 | 9.1 | 0 | 0 | 0 | 0 | 0 |
| ED 4.4.4                                                                          | 0 | 0    | 1 | 20 | 1 | 8.3 | 0 | 0 | 0 | 0 | 0 |
| ED 4.5 Quality/Coverage of Data: Extent to which current research/data is sex an  |   |      |   |    |   |     |   |   |   |   |   |
| ED 4.5.1                                                                          | 2 | 14.3 | 0 | 0  | 0 | 0   | 0 | 0 | 0 | 0 | 0 |

**Note:**

- For readability purpose, complete wording for questions/variables has been provided as Appendix 1.
- Only the percentages of respondents who responded "don't know" to the respective question or sub-question was included in this table.
- Highlighted are values > 10%

|                                                                                  |   |      |   |    |   |      |   |   |   |   |   |   |
|----------------------------------------------------------------------------------|---|------|---|----|---|------|---|---|---|---|---|---|
| ED 4.5.2                                                                         | 1 | 7.1  | 0 | 0  | 0 | 0    | 0 | 0 | 0 | 0 | 0 | 0 |
| ED 4.5.3                                                                         | 1 | 7.1  | 0 | 0  | 0 | 0    | 0 | 0 | 0 | 0 | 0 | 0 |
| ED 4.5.4                                                                         | 1 | 7.1  | 0 | 0  | 0 | 0    | 0 | 0 | 0 | 0 | 0 | 0 |
| ED 4.6 Record-Keeping: Extent to which systems for education-related recordkeepi |   |      |   |    |   |      |   |   |   |   |   |   |
| Don't know                                                                       | 1 | 7.1  | 0 | 0  | 1 | 8.3  | 0 | 0 | 0 | 0 | 0 | 0 |
| ED 4.7 Quality Research Institutions: Extent to which the country has the capaci |   |      |   |    |   |      |   |   |   |   |   |   |
| Don't know                                                                       | 1 | 7.1  | 1 | 20 | 1 | 8.3  | 0 | 0 | 0 | 0 | 0 | 0 |
| ED 4.8 Evaluation: Extent to which education program statistics, surveys, and sm |   |      |   |    |   |      |   |   |   |   |   |   |
| Don't know                                                                       | 0 | 0    | 0 | 0  | 1 | 8.3  | 0 | 0 | 0 | 0 | 0 | 0 |
| ED 4.9 Management, Use of Evaluation Findings: Extent to which local-level educ  |   |      |   |    |   |      |   |   |   |   |   |   |
| Don't know                                                                       | 1 | 7.1  | 0 | 0  | 1 | 8.3  | 0 | 0 | 0 | 0 | 0 | 0 |
| ED 4.10 Ministerial Use of Evaluation Findings: Extent to which the relevant min |   |      |   |    |   |      |   |   |   |   |   |   |
| Don't know                                                                       | 4 | 28.6 | 0 | 0  | 1 | 8.3  | 0 | 0 | 0 | 0 | 0 | 0 |
| ED 4.11 Dissemination of Information to Other Implementing Bodies:               |   |      |   |    |   |      |   |   |   |   |   |   |
| ED 5.1 CSO Actor Power: Extent to which CSO actors are in strong placements with |   |      |   |    |   |      |   |   |   |   |   |   |
| Don't know                                                                       | 1 | 7.1  | 1 | 20 | 1 | 8.3  | 0 | 0 | 0 | 0 | 0 | 0 |
| ED 5.2 Budget Analysis as a CSO Tool: Extent to which CSOs utilize budget analys |   |      |   |    |   |      |   |   |   |   |   |   |
| Don't know                                                                       | 5 | 35.7 | 2 | 40 | 2 | 16.7 | 0 | 0 | 0 | 0 | 0 | 0 |

**Note:**

- For readability purpose, complete wording for questions/variables has been provided as Appendix 1.
- Only the percentages of respondents who responded “don’t know” to the respective question or sub-question was included in this table.
- Highlighted are values > 10%

|                                                                                  |   |     |   |    |   |      |   |   |   |      |   |   |
|----------------------------------------------------------------------------------|---|-----|---|----|---|------|---|---|---|------|---|---|
| ED 5.3 Community inclusion: Extent to which CSOs are involved in efforts to expl |   |     |   |    |   |      |   |   |   |      |   |   |
| Don't know                                                                       | 0 | 0   | 0 | 0  | 2 | 16.7 | 0 | 0 | 0 | 0    | 0 | 0 |
| ED 5.4 Community Involvement in Education: Extent to which CSOs participate in b |   |     |   |    |   |      |   |   |   |      |   |   |
| Don't know                                                                       | 0 | 0   | 0 | 0  | 1 | 8.3  | 0 | 0 | 0 | 0    | 0 | 0 |
| ED 5.5 Social Franchising: Extent to which CSOs are involved with social franchi |   |     |   |    |   |      |   |   |   |      |   |   |
| Don't know                                                                       | 0 | 0   | 1 | 20 | 1 | 8.3  | 0 | 0 | 0 | 0    | 0 | 0 |
| ED 5.6 Technology: Extent to which CSOs are leveraging information communication |   |     |   |    |   |      |   |   |   |      |   |   |
| Don't know                                                                       | 0 | 0   | 1 | 20 | 1 | 8.3  | 0 | 0 | 0 | 0    | 0 | 0 |
| ED 5.7 Human Rights and Access to/Quality of Education: Extent to which CSOs adv |   |     |   |    |   |      |   |   |   |      |   |   |
| Don't know                                                                       | 0 | 0   | 0 | 0  | 2 | 16.7 | 0 | 0 | 0 | 0    | 0 | 0 |
| ED 5.8 Social and Behavior Change (SBC): Extent to which CSOs support SBC interv |   |     |   |    |   |      |   |   |   |      |   |   |
| Don't know                                                                       | 0 | 0   | 0 | 0  | 2 | 16.7 | 0 | 0 | 0 | 0    | 0 | 0 |
| ED 5.9 Advocacy/Accountability: Extent to which CSOs support the training and ca |   |     |   |    |   |      |   |   |   |      |   |   |
| Don't know                                                                       | 0 | 0   | 1 | 20 | 2 | 16.7 | 0 | 0 | 0 | 0    | 0 | 0 |
| ED 5.10 CSO-Led Assessment and Monitoring: Extent to which CSOs assess, monitor  |   |     |   |    |   |      |   |   |   |      |   |   |
| Don't know                                                                       | 1 | 7.1 | 1 | 20 | 2 | 16.7 | 0 | 0 | 1 | 11.1 | 0 | 0 |
| ED 5.11 Forming Partnerships between CSOs: Extent to which CSOs have formed nati |   |     |   |    |   |      |   |   |   |      |   |   |

**Note:**

- For readability purpose, complete wording for questions/variables has been provided as Appendix 1.
- Only the percentages of respondents who responded “don’t know” to the respective question or sub-question was included in this table.
- Highlighted are values > 10%

|                                                                                      |   |     |   |    |   |      |   |     |   |   |   |   |
|--------------------------------------------------------------------------------------|---|-----|---|----|---|------|---|-----|---|---|---|---|
| Don't know                                                                           | 1 | 7.1 | 1 | 20 | 2 | 16.7 | 0 | 0   | 0 | 0 | 0 | 0 |
| WE 1.1 Gender Equality Policy: Extent to which gender equality is considered/int     |   |     |   |    |   |      |   |     |   |   |   |   |
| WE 1.2 Level of commitment to the Convention on the Elimination of all Forms of      |   |     |   |    |   |      |   |     |   |   |   |   |
| WE 1.3 Equity in Marriage and Family Policies: Extent to which the principle of      |   |     |   |    |   |      |   |     |   |   |   |   |
| WE 1.4 Policy on Age at Marriage: Extent to which legal age at marriage for fema     |   |     |   |    |   |      |   |     |   |   |   |   |
| WE 1.5 Violence Against Women Measures: Level of regulations and measures on vio     |   |     |   |    |   |      |   |     |   |   |   |   |
| Don't know                                                                           | 0 | 0   | 0 | 0  | 0 | 0    | 1 | 6.2 | 0 | 0 | 0 | 0 |
| WE 1.6 Female Genital Cutting/Mutilation: Level of regulation and measures on fe     |   |     |   |    |   |      |   |     |   |   |   |   |
| Don't know                                                                           | 0 | 0   | 0 | 0  | 0 | 0    | 1 | 6.2 | 0 | 0 | 0 | 0 |
| WE 1.7 Women,Äôs Health Measures: Level of protocols for the protection of women,Äôs |   |     |   |    |   |      |   |     |   |   |   |   |
| WE 1.8 Education Measures: Extent to which there are mechanisms to promote girls     |   |     |   |    |   |      |   |     |   |   |   |   |
| WE 1.9 Rights Measures: Level of enforcement of policies on women,Äôs rights.        |   |     |   |    |   |      |   |     |   |   |   |   |
| WE 1.10 Equitable Work: Extent to which there are policies on equitable working      |   |     |   |    |   |      |   |     |   |   |   |   |
| WE 1.11 Equitable Land/Asset Ownership: Extent to which there are policies to af     |   |     |   |    |   |      |   |     |   |   |   |   |

**Note:**

- For readability purpose, complete wording for questions/variables has been provided as Appendix 1.
- Only the percentages of respondents who responded “don’t know” to the respective question or sub-question was included in this table.
- Highlighted are values > 10%

|                                                                                  |   |      |   |    |   |      |   |    |   |   |   |     |
|----------------------------------------------------------------------------------|---|------|---|----|---|------|---|----|---|---|---|-----|
| WE 1.12 Conflict, Women & Peacebuilding: Level of implementation of Security UN  |   |      |   |    |   |      |   |    |   |   |   |     |
| Don't know                                                                       | 3 | 37.5 | 1 | 10 | 0 | 0    | 0 | 0  | 0 | 0 | 1 | 7.7 |
| WE 1.13 Gender Quotas in Politics: Existence, and level of implementation, of qu |   |      |   |    |   |      |   |    |   |   |   |     |
| WE 1.14 Sustainable Development Goal 5: Level of commitment to fulfilling Sustai |   |      |   |    |   |      |   |    |   |   |   |     |
| Don't know                                                                       | 1 | 12.5 | 0 | 0  | 0 | 0    | 0 | 0  | 0 | 0 | 0 | 0   |
| WE 1.15 Customary Law Revision: Extent to which customary laws have been reviewe |   |      |   |    |   |      |   |    |   |   |   |     |
| Don't know                                                                       | 0 | 0    | 0 | 0  | 0 | 0    | 4 | 25 | 0 | 0 | 0 | 0   |
| WE 1.16 Costing for WE: Extent to which there is sufficient planning and allocat |   |      |   |    |   |      |   |    |   |   |   |     |
| Don't know                                                                       | 2 | 25   | 2 | 20 | 0 | 0    | 0 | 0  | 0 | 0 | 0 | 0   |
| WE 1.17 Staffing for WE: Extent to which:                                        |   |      |   |    |   |      |   |    |   |   |   |     |
| WE 1.18 Transparency and Accountability: Extent to which the government provides |   |      |   |    |   |      |   |    |   |   |   |     |
| Don't know                                                                       | 1 | 12.5 | 0 | 0  | 1 | 11.1 | 0 | 0  | 0 | 0 | 0 | 0   |
| WE 2.1 Gender Mainstreaming: Extent to which services or programs within and acr |   |      |   |    |   |      |   |    |   |   |   |     |
| WE 2.2 Gender-Transformative Programming: Extent to which services or programs w |   |      |   |    |   |      |   |    |   |   |   |     |
| Don't know                                                                       | 0 | 0    | 1 | 10 | 0 | 0    | 0 | 0  | 0 | 0 | 0 | 0   |
| WE 2.3 Education: Extent to which education services or programs focus on girl,Ã |   |      |   |    |   |      |   |    |   |   |   |     |

**Note:**

- For readability purpose, complete wording for questions/variables has been provided as Appendix 1.
- Only the percentages of respondents who responded “don’t know” to the respective question or sub-question was included in this table.
- Highlighted are values > 10%



|                                                                                      |   |      |   |   |   |   |   |      |   |   |   |     |
|--------------------------------------------------------------------------------------|---|------|---|---|---|---|---|------|---|---|---|-----|
| WE 2.4. Dropouts: Extent to which there are programs to prevent female dropouts.     |   |      |   |   |   |   |   |      |   |   |   |     |
| WE 2.5 Technology Literacy: Extent to which technology literacy is promoted among    |   |      |   |   |   |   |   |      |   |   |   |     |
| WE 2.6 Employment: Extent to which job-creation programs and labor market police     |   |      |   |   |   |   |   |      |   |   |   |     |
| WE 2.7 Women as Mothers and Workers: Extent to which the government makes possible   |   |      |   |   |   |   |   |      |   |   |   |     |
| WE 2.8 Family Planning for Empowerment: Extent to which FP services or programs      |   |      |   |   |   |   |   |      |   |   |   |     |
| Don't know                                                                           | 0 | 0    | 0 | 0 | 0 | 0 | 0 | 0    | 0 | 0 | 1 | 8.3 |
| WE 2.9 Political and Public Representation: Extent of implementation of programs     |   |      |   |   |   |   |   |      |   |   |   |     |
| WE 2.10 Violence: Extent of fight against violence against women and children and    |   |      |   |   |   |   |   |      |   |   |   |     |
| WE 2.11 Child Marriage: Extent of law enforcement to eliminate child marriage.       |   |      |   |   |   |   |   |      |   |   |   |     |
| WE 2.12 Female Genital Mutilation/Cutting: Extent of law enforcement to eliminate    |   |      |   |   |   |   |   |      |   |   |   |     |
| Don't know                                                                           | 1 | 12.5 | 0 | 0 | 0 | 0 | 3 | 18.8 | 0 | 0 | 0 | 0   |
| WE 3.1 Advocates: Extent to which advocates for girls, and women, empowerment        |   |      |   |   |   |   |   |      |   |   |   |     |
| Don't know                                                                           | 1 | 12.5 | 0 | 0 | 0 | 0 | 0 | 0    | 0 | 0 | 0 | 0   |
| WE 3.2. Girls and Women: Extent to which the advocacy efforts in this area encompass |   |      |   |   |   |   |   |      |   |   |   |     |
| Don't know                                                                           | 1 | 12.5 | 0 | 0 | 0 | 0 | 0 | 0    | 0 | 0 | 0 | 0   |

**Note:**

- For readability purpose, complete wording for questions/variables has been provided as Appendix 1.
- Only the percentages of respondents who responded “don’t know” to the respective question or sub-question was included in this table.
- Highlighted are values > 10%

|                                                                                     |   |      |   |   |   |      |     |   |   |   |     |
|-------------------------------------------------------------------------------------|---|------|---|---|---|------|-----|---|---|---|-----|
| WE 3.3 Information Dissemination: Extent to which the government undertakes suff    |   |      |   |   |   |      |     |   |   |   |     |
| Don't know                                                                          | 1 | 12.5 | 0 | 0 | 0 | 0    | 0   | 0 | 0 | 0 | 0   |
| WE 3.4 Leveraging Partnerships: Extent to which the government leverages partner    |   |      |   |   |   |      |     |   |   |   |     |
| Don't know                                                                          | 1 | 12.5 | 0 | 0 | 0 | 0    | 0   | 0 | 0 | 0 | 0   |
| WE 3.5 Employment: Extent to which stakeholders call for laws, policies and prog    |   |      |   |   |   |      |     |   |   |   |     |
| Don't know                                                                          | 1 | 12.5 | 0 | 0 | 0 | 0    | 0   | 0 | 0 | 0 | 0   |
| WE 3.6 Education: Extent to which a priority of advocates is to promote the fulf    |   |      |   |   |   |      |     |   |   |   |     |
| Don't know                                                                          | 1 | 12.5 | 0 | 0 | 0 | 0    | 0   | 0 | 0 | 0 | 0   |
| WE 3.7 Violence: Extent to which advocates successfully engage with the governme    |   |      |   |   |   |      |     |   |   |   |     |
| Don't know                                                                          | 1 | 12.5 | 0 | 0 | 0 | 1    | 6.2 | 0 | 0 | 0 | 0   |
| WE 4.1 Strength of Observatory/Stakeholder/Technical Working Group for WE: Exten    |   |      |   |   |   |      |     |   |   |   |     |
| WE 4.1.1                                                                            | 1 | 12.5 | 0 | 0 | 0 | 0    | 0   | 0 | 0 | 0 | 0   |
| WE 4.1.2                                                                            | 2 | 28.6 | 0 | 0 | 0 | 0    | 0   | 0 | 0 | 0 | 0   |
| WE 4.1.3                                                                            | 1 | 14.3 | 0 | 0 | 0 | 0    | 0   | 0 | 0 | 0 | 0   |
| WE 4.2 Women,Åôs Rights Research Strategy: Extent to which the national-†WE plan an |   |      |   |   |   |      |     |   |   |   |     |
| Don't know                                                                          | 1 | 12.5 | 0 | 0 | 1 | 11.1 | 0   | 0 | 0 | 1 | 8.3 |
| WE 4.3 Data Gathering Partners:                                                     |   |      |   |   |   |      |     |   |   |   |     |
| WE 4.3.1                                                                            | 1 | 12.5 | 0 | 0 | 0 | 0    | 0   | 0 | 0 | 1 | 8.3 |

**Note:**

- For readability purpose, complete wording for questions/variables has been provided as Appendix 1.
- Only the percentages of respondents who responded “don’t know” to the respective question or sub-question was included in this table.
- Highlighted are values > 10%

|                                                                                  |   |      |   |    |   |      |   |   |   |   |      |
|----------------------------------------------------------------------------------|---|------|---|----|---|------|---|---|---|---|------|
| WE 4.3.2                                                                         | 1 | 14.3 | 0 | 0  | 0 | 0    | 0 | 0 | 0 | 1 | 8.3  |
| WE 4.3.3                                                                         | 2 | 25   | 0 | 0  | 0 | 0    | 0 | 0 | 0 | 1 | 8.3  |
| WE 4.4 Topical Data Gathering:                                                   |   |      |   |    |   |      |   |   |   |   |      |
| WE 4.4.1                                                                         | 1 | 12.5 | 0 | 0  | 0 | 0    | 0 | 0 | 0 | 1 | 8.3  |
| WE 4.4.2                                                                         | 1 | 12.5 | 0 | 0  | 0 | 0    | 0 | 0 | 0 | 1 | 8.3  |
| WE 4.4.3                                                                         | 1 | 12.5 | 0 | 0  | 1 | 11.1 | 0 | 0 | 0 | 1 | 9.1  |
| WE 4.4.4                                                                         | 1 | 12.5 | 0 | 0  | 0 | 0    | 0 | 0 | 0 | 1 | 10   |
| WE 4.5 Quality/Coverage of Data:                                                 |   |      |   |    |   |      |   |   |   |   |      |
| WE 4.5.1                                                                         | 1 | 12.5 | 1 | 10 | 0 | 0    | 0 | 0 | 0 | 1 | 9.1  |
| WE 4.5.2                                                                         | 1 | 12.5 | 1 | 10 | 0 | 0    | 0 | 0 | 0 | 1 | 8.3  |
| WE 4.5.3                                                                         | 2 | 25   | 1 | 10 | 0 | 0    | 0 | 0 | 0 | 1 | 8.3  |
| WE 4.6 Quality Research Institutions: Extent to which the country supports and s |   |      |   |    |   |      |   |   |   |   |      |
| Don't know                                                                       | 2 | 25   | 1 | 10 | 0 | 0    | 0 | 0 | 0 | 2 | 16.7 |
| WE 4.7 Evaluation: Extent to which program statistics, surveys, and small studie |   |      |   |    |   |      |   |   |   |   |      |
| Don't know                                                                       | 3 | 37.5 | 1 | 10 | 0 | 0    | 0 | 0 | 0 | 1 | 8.3  |
| WE 4.8 Management, Use of Evaluation Findings: Extent to which local-level prog  |   |      |   |    |   |      |   |   |   |   |      |
| Don't know                                                                       | 3 | 37.5 | 0 | 0  | 0 | 0    | 0 | 0 | 0 | 1 | 8.3  |
| WE 4.9 Ministerial Use of Evaluation Findings: Extent to which the Ministry admi |   |      |   |    |   |      |   |   |   |   |      |
| Don't know                                                                       | 3 | 37.5 | 1 | 10 | 1 | 11.1 | 0 | 0 | 0 | 1 | 8.3  |
| WE 4.10 Dissemination of Information to other Implementing Bodies: Extent to whi |   |      |   |    |   |      |   |   |   |   |      |

**Note:**

- For readability purpose, complete wording for questions/variables has been provided as Appendix 1.
- Only the percentages of respondents who responded “don’t know” to the respective question or sub-question was included in this table.
- Highlighted are values > 10%

|                                                                                  |   |      |   |      |   |      |   |   |   |   |   |     |
|----------------------------------------------------------------------------------|---|------|---|------|---|------|---|---|---|---|---|-----|
| Don't know                                                                       | 2 | 25   | 0 | 0    | 0 | 0    | 0 | 0 | 0 | 0 | 1 | 8.3 |
| WE 5.1 CSO Actor Power: Extent to which WE civil society actors are in strong po |   |      |   |      |   |      |   |   |   |   |   |     |
| Don't know                                                                       | 1 | 14.3 | 0 | 0    | 0 | 0    | 0 | 0 | 0 | 0 | 1 | 8.3 |
| WE 5.2 Budget Analysis as a CSO Tool: Extent to which CSOs utilize budget analys |   |      |   |      |   |      |   |   |   |   |   |     |
| Don't know                                                                       | 1 | 14.3 | 1 | 11.1 | 0 | 0    | 0 | 0 | 0 | 0 | 1 | 8.3 |
| WE 5.3 Community-Based Service Delivery Support: Extent to which CSOs participat |   |      |   |      |   |      |   |   |   |   |   |     |
| Don't know                                                                       | 1 | 14.3 | 0 | 0    | 0 | 0    | 0 | 0 | 0 | 0 | 1 | 8.3 |
| WE 5.4 Human Rights and Quality of Implementation: Extent to which CSOs advocate |   |      |   |      |   |      |   |   |   |   |   |     |
| Don't know                                                                       | 1 | 14.3 | 0 | 0    | 0 | 0    | 0 | 0 | 0 | 0 | 1 | 8.3 |
| WE 5.5 Social and Behavior Change (SBC): Extent to which CSOs support SBC interv |   |      |   |      |   |      |   |   |   |   |   |     |
| Don't know                                                                       | 1 | 14.3 | 0 | 0    | 0 | 0    | 0 | 0 | 0 | 0 | 1 | 8.3 |
| WE 5.6 Youth: Extent to which CSOs promote gender empowerment through youth prog |   |      |   |      |   |      |   |   |   |   |   |     |
| Don't know                                                                       | 1 | 14.3 | 0 | 0    | 1 | 11.1 | 0 | 0 | 0 | 0 | 1 | 8.3 |
| WE 5.7 Programming for Men: Extent to which CSOs support WE policies, interventi |   |      |   |      |   |      |   |   |   |   |   |     |
| Don't know                                                                       | 1 | 14.3 | 0 | 0    | 0 | 0    | 0 | 0 | 0 | 0 | 1 | 8.3 |
| WE 5.8 Advocacy/Accountability: Extent to which CSOs support the training and ca |   |      |   |      |   |      |   |   |   |   |   |     |
| Don't know                                                                       | 1 | 14.3 | 0 | 0    | 0 | 0    | 0 | 0 | 0 | 0 | 1 | 8.3 |

**Note:**

- For readability purpose, complete wording for questions/variables has been provided as Appendix 1.
- Only the percentages of respondents who responded “don't know” to the respective question or sub-question was included in this table.
- Highlighted are values > 10%

|                                                                                   |   |      |   |     |   |   |   |   |   |   |   |     |
|-----------------------------------------------------------------------------------|---|------|---|-----|---|---|---|---|---|---|---|-----|
| WE 5.9 CSO-Led Assessment and Monitoring: Extent to which CSOs assess, monitor a  |   |      |   |     |   |   |   |   |   |   |   |     |
| Don't know                                                                        | 1 | 14.3 | 0 | 0   | 0 | 0 | 0 | 0 | 0 | 0 | 1 | 8.3 |
| WE 5.10 Forming Partnerships between CSOs: Extent to which CSOs have formed nati  |   |      |   |     |   |   |   |   |   |   |   |     |
| Don't know                                                                        | 1 | 14.3 | 0 | 0   | 0 | 0 | 0 | 0 | 0 | 0 | 1 | 8.3 |
| LM 1.1 Global Economic Integration: Extent to which the country aims to be integ  |   |      |   |     |   |   |   |   |   |   |   |     |
| LM 1.2 Regional Economic Integration: Extent to which the country aims to be int  |   |      |   |     |   |   |   |   |   |   |   |     |
| LM 1.3 Technology: Extent to which the government has invested in infrastructure  |   |      |   |     |   |   |   |   |   |   |   |     |
| LM 1.4 Government Support: Extent to which policies and plans are in place that   |   |      |   |     |   |   |   |   |   |   |   |     |
| Don't know                                                                        | 0 | 0    | 1 | 7.7 | 0 | 0 | 0 | 0 | 0 | 0 | 0 | 0   |
| LM 1.5 Unemployment: Extent to which policies account for and address unemployme  |   |      |   |     |   |   |   |   |   |   |   |     |
| LM 1.6 Disadvantaged/Vulnerable Groups: Extent to which policies exist, and are   |   |      |   |     |   |   |   |   |   |   |   |     |
| LM 1.7 Climate Change and Environmental Sustainability: Extent to which the agri  |   |      |   |     |   |   |   |   |   |   |   |     |
| LM 1.8 Urbanization: -†Extent to which policies and planning anticipate and are p |   |      |   |     |   |   |   |   |   |   |   |     |
| Don't know                                                                        | 1 | 11.1 | 0 | 0   | 0 | 0 | 0 | 0 | 0 | 0 | 0 | 0   |
| LM 1.9 Service-Led Economy: Extent to which policies and framework are in place   |   |      |   |     |   |   |   |   |   |   |   |     |

**Note:**

- For readability purpose, complete wording for questions/variables has been provided as Appendix 1.
- Only the percentages of respondents who responded “don’t know” to the respective question or sub-question was included in this table.
- Highlighted are values > 10%

|                                                                                  |   |      |   |     |   |   |   |      |   |   |   |   |
|----------------------------------------------------------------------------------|---|------|---|-----|---|---|---|------|---|---|---|---|
| LM 1.10 Corporate Social Responsibility: Extent to which national legislation in |   |      |   |     |   |   |   |      |   |   |   |   |
| Don't know                                                                       | 2 | 22.2 | 0 | 0   | 0 | 0 | 1 | 11.1 | 0 | 0 | 0 | 0 |
| LM 1.11 Targeted Labor Market Investments: Extent to which the government has ta |   |      |   |     |   |   |   |      |   |   |   |   |
| LM 1.12 Self-Employment: Extent to which policies support raising the returns to |   |      |   |     |   |   |   |      |   |   |   |   |
| LM 1.13 Microcredit: Extent to which the government enables access to microcredi |   |      |   |     |   |   |   |      |   |   |   |   |
| Don't know                                                                       | 0 | 0    | 0 | 0   | 0 | 0 | 1 | 11.1 | 0 | 0 | 0 | 0 |
| LM 1.14 Savings: Extent to which the government supports the creation of accessi |   |      |   |     |   |   |   |      |   |   |   |   |
| LM 1.15 Skill Acquisition: Extent to which policies exist, and are effectively i |   |      |   |     |   |   |   |      |   |   |   |   |
| LM 2.1 Unemployment Reduction: Extent to which there are efforts toward developi |   |      |   |     |   |   |   |      |   |   |   |   |
| Don't know                                                                       | 0 | 0    | 1 | 7.7 | 0 | 0 | 0 | 0    | 0 | 0 | 0 | 0 |
| LM 2.2. Youth Unemployment: Extent to which labor market programs have effective |   |      |   |     |   |   |   |      |   |   |   |   |
| Don't know                                                                       | 0 | 0    | 1 | 7.7 | 0 | 0 | 0 | 0    | 0 | 0 | 0 | 0 |
| LM 2.3 Access to Microcredit: Extent to which national and regional funds have b |   |      |   |     |   |   |   |      |   |   |   |   |
| Don't know                                                                       | 0 | 0    | 1 | 7.7 | 0 | 0 | 0 | 0    | 0 | 0 | 0 | 0 |
| LM 2.4 Harnessing Youth Special Capacities: Extent to which programs and service |   |      |   |     |   |   |   |      |   |   |   |   |
| Don't know                                                                       | 0 | 0    | 0 | 0   | 0 | 0 | 1 | 11.1 | 0 | 0 | 0 | 0 |

**Note:**

- For readability purpose, complete wording for questions/variables has been provided as Appendix 1.
- Only the percentages of respondents who responded “don’t know” to the respective question or sub-question was included in this table.
- Highlighted are values > 10%

|                                                                                      |   |             |   |   |   |             |   |             |   |   |   |   |
|--------------------------------------------------------------------------------------|---|-------------|---|---|---|-------------|---|-------------|---|---|---|---|
| LM 2.5 Early Labor Opportunities: Extent to which programs and government legis      |   |             |   |   |   |             |   |             |   |   |   |   |
| LM 2.6 Youth Entrance into Labor: Extent of the promotion of youth volunteer and     |   |             |   |   |   |             |   |             |   |   |   |   |
| LM 2.7 Entrepreneurial Ventures: Extent to which people have enhanced access to      |   |             |   |   |   |             |   |             |   |   |   |   |
| LM 2.8 Resources for Youth Entrepreneurship: Extent to which entrepreneurial ven     |   |             |   |   |   |             |   |             |   |   |   |   |
| Don't know                                                                           | 0 | 0           | 0 | 0 | 0 | 0           | 1 | <b>11.1</b> | 0 | 0 | 0 | 0 |
| LM 2.9 Vocational Opportunities: Extent to which vocational training opportuniti     |   |             |   |   |   |             |   |             |   |   |   |   |
| LM 2.10 Education and Labor: Extent to which improvements have been made to impr     |   |             |   |   |   |             |   |             |   |   |   |   |
| LM 2.11 Women-Friendly Labor: Extent to which workplaces in the private and publ     |   |             |   |   |   |             |   |             |   |   |   |   |
| LM 2.12 Job Security:                                                                |   |             |   |   |   |             |   |             |   |   |   |   |
| Don't know                                                                           | 0 | 0           | 0 | 0 | 1 | <b>12.5</b> | 0 | 0           | 0 | 0 | 0 | 0 |
| LM 2.13 Minimum Wage: Extent to which a minimum wage is applied to the ‚Äòtypical,Äô |   |             |   |   |   |             |   |             |   |   |   |   |
| LM 2.14 Labor Market Programs: Extent to which labor market programs have effect     |   |             |   |   |   |             |   |             |   |   |   |   |
| Don't know                                                                           | 1 | <b>11.1</b> | 0 | 0 | 0 | 0           | 0 | 0           | 0 | 0 | 0 | 0 |
| LM 2.15 Informality in the Labor Market: Extent to which the programs are implem     |   |             |   |   |   |             |   |             |   |   |   |   |
| LM 3.1 Gender Equality in the Labor Market: Extent to which groups and individua     |   |             |   |   |   |             |   |             |   |   |   |   |

**Note:**

- For readability purpose, complete wording for questions/variables has been provided as Appendix 1.
- Only the percentages of respondents who responded “don’t know” to the respective question or sub-question was included in this table.
- Highlighted are values > 10%

|                                                                                  |   |      |   |      |   |      |   |   |   |   |   |   |
|----------------------------------------------------------------------------------|---|------|---|------|---|------|---|---|---|---|---|---|
| LM 3.2 Youth Equality in the Labor Market: Extent to which individuals and group |   |      |   |      |   |      |   |   |   |   |   |   |
| Don't know                                                                       | 1 | 11.1 | 0 | 0    | 0 | 0    | 0 | 0 | 0 | 0 | 0 | 0 |
| LM 3.3 Minimum Wage Advocacy: Extent to which advocacy groups are successful in  |   |      |   |      |   |      |   |   |   |   |   |   |
| Don't know                                                                       | 0 | 0    | 1 | 7.7  | 0 | 0    | 0 | 0 | 0 | 0 | 0 | 0 |
| LM 3.4 Government Advocacy: Extent to which members of the government advocates  |   |      |   |      |   |      |   |   |   |   |   |   |
| Don't know                                                                       | 0 | 0    | 1 | 7.7  | 0 | 0    | 0 | 0 | 0 | 0 | 0 | 0 |
| LM 3.5 Protections: Extent to which advocacy exists for job protection, and soci |   |      |   |      |   |      |   |   |   |   |   |   |
| Don't know                                                                       | 0 | 0    | 1 | 7.7  | 0 | 0    | 0 | 0 | 0 | 0 | 0 | 0 |
| LM 4.1 Strength of Observatory/Stakeholder/Technical Working Group for the LM: E |   |      |   |      |   |      |   |   |   |   |   |   |
| LM 4.1.1                                                                         | 1 | 11.1 | 2 | 15.4 | 0 | 0    | 0 | 0 | 0 | 0 | 0 | 0 |
| LM 4.1.2                                                                         | 1 | 11.1 | 2 | 15.4 | 0 | 0    | 0 | 0 | 0 | 0 | 0 | 0 |
| LM 4.1.3                                                                         | 1 | 11.1 | 3 | 23.1 | 0 | 0    | 0 | 0 | 0 | 0 | 0 | 0 |
| LM 4.2 Labor Market Research Strategy: Extent to which the national documents in |   |      |   |      |   |      |   |   |   |   |   |   |
| Don't know                                                                       | 0 | 0    | 3 | 23.1 | 0 | 0    | 0 | 0 | 0 | 0 | 0 | 0 |
| LM 4.3 Labor Market Analysis Partners:                                           |   |      |   |      |   |      |   |   |   |   |   |   |
| LM 4.3.1                                                                         | 0 | 0    | 2 | 15.4 | 0 | 0    | 0 | 0 | 0 | 0 | 0 | 0 |
| LM 4.3.2                                                                         | 0 | 0    | 2 | 15.4 | 0 | 0    | 0 | 0 | 0 | 0 | 0 | 0 |
| LM 4.3.3                                                                         | 0 | 0    | 2 | 15.4 | 1 | 12.5 | 0 | 0 | 0 | 0 | 0 | 0 |
| LM 4.4 Areas of Research in the Labor Market:                                    |   |      |   |      |   |      |   |   |   |   |   |   |

**Note:**

- For readability purpose, complete wording for questions/variables has been provided as Appendix 1.
- Only the percentages of respondents who responded “don’t know” to the respective question or sub-question was included in this table.
- Highlighted are values > 10%



|                                                                                  |   |   |   |      |   |      |   |   |   |   |   |   |
|----------------------------------------------------------------------------------|---|---|---|------|---|------|---|---|---|---|---|---|
| LM 4.4.1                                                                         | 0 | 0 | 1 | 7.7  | 1 | 12.5 | 0 | 0 | 0 | 0 | 0 | 0 |
| LM 4.4.2                                                                         | 0 | 0 | 1 | 7.7  | 1 | 12.5 | 0 | 0 | 0 | 0 | 0 | 0 |
| LM 4.4.3                                                                         | 0 | 0 | 1 | 7.7  | 1 | 12.5 | 0 | 0 | 0 | 0 | 0 | 0 |
| LM 4.4.4                                                                         | 0 | 0 | 2 | 15.4 | 1 | 12.5 | 0 | 0 | 0 | 0 | 0 | 0 |
| LM 4.5 Quality/Coverage of Data:                                                 |   |   |   |      |   |      |   |   |   |   |   |   |
| LM 4.5.1                                                                         | 0 | 0 | 2 | 15.4 | 1 | 12.5 | 0 | 0 | 0 | 0 | 0 | 0 |
| LM 4.5.2                                                                         | 0 | 0 | 2 | 15.4 | 1 | 12.5 | 0 | 0 | 0 | 0 | 0 | 0 |
| LM 4.5.3                                                                         | 0 | 0 | 2 | 15.4 | 1 | 12.5 | 0 | 0 | 0 | 0 | 0 | 0 |
| LM 4.6 Record-Keeping: Extent to which systems for labor market recordkeeping, r |   |   |   |      |   |      |   |   |   |   |   |   |
| Don't know                                                                       | 0 | 0 | 2 | 15.4 | 1 | 12.5 | 0 | 0 | 0 | 0 | 0 | 0 |
| LM 4.7 Quality Research Institutions: Extent to which the country has the capaci |   |   |   |      |   |      |   |   |   |   |   |   |
| Don't know                                                                       | 0 | 0 | 2 | 15.4 | 1 | 12.5 | 0 | 0 | 0 | 0 | 0 | 0 |
| LM 4.8 Evaluation: Extent to which program statistics, surveys, and small studie |   |   |   |      |   |      |   |   |   |   |   |   |
| Don't know                                                                       | 0 | 0 | 1 | 7.7  | 1 | 12.5 | 0 | 0 | 0 | 0 | 0 | 0 |
| LM 4.9 Management, Use of Evaluation Findings: Extent to which local-level prog  |   |   |   |      |   |      |   |   |   |   |   |   |
| Don't know                                                                       | 0 | 0 | 1 | 7.7  | 1 | 12.5 | 0 | 0 | 0 | 0 | 0 | 0 |
| LM 4.10 Ministerial Use of Evaluation Findings: Extent to which the Ministry adm |   |   |   |      |   |      |   |   |   |   |   |   |
| Don't know                                                                       | 0 | 0 | 2 | 15.4 | 1 | 12.5 | 0 | 0 | 0 | 0 | 0 | 0 |
| LM 4.11 Dissemination of Information to Other Implementing Bodies: Extent to whi |   |   |   |      |   |      |   |   |   |   |   |   |

**Note:**

- For readability purpose, complete wording for questions/variables has been provided as Appendix 1.
- Only the percentages of respondents who responded “don’t know” to the respective question or sub-question was included in this table.
- Highlighted are values > 10%

|                                                                                  |   |      |   |      |   |      |   |      |   |   |   |   |
|----------------------------------------------------------------------------------|---|------|---|------|---|------|---|------|---|---|---|---|
| Don't know                                                                       | 0 | 0    | 1 | 7.7  | 1 | 12.5 | 0 | 0    | 0 | 0 | 0 | 0 |
| LM 5.1 CSO Actor Power: Extent to which CSO actors are in strong positions to in |   |      |   |      |   |      |   |      |   |   |   |   |
| Don't know                                                                       | 1 | 11.1 | 1 | 7.7  | 0 | 0    | 0 | 0    | 0 | 0 | 0 | 0 |
| LM 5.2 Budget Analysis as a CSO Tool: Extent to which CSOs utilize budget analys |   |      |   |      |   |      |   |      |   |   |   |   |
| Don't know                                                                       | 2 | 22.2 | 2 | 15.4 | 0 | 0    | 1 | 11.1 | 0 | 0 | 0 | 0 |
| LM 5.3 Community-Based Service Delivery Support: Extent to which CSOs participat |   |      |   |      |   |      |   |      |   |   |   |   |
| Don't know                                                                       | 2 | 22.2 | 1 | 7.7  | 0 | 0    | 1 | 11.1 | 0 | 0 | 0 | 0 |
| LM 5.4 Diversification of Job Opportunities: Extent to which CSOs and the privat |   |      |   |      |   |      |   |      |   |   |   |   |
| Don't know                                                                       | 2 | 22.2 | 1 | 7.7  | 0 | 0    | 1 | 11.1 | 0 | 0 | 0 | 0 |
| LM 5.5 Human Rights and Quality of Implementation: Extent to which CSOs support  |   |      |   |      |   |      |   |      |   |   |   |   |
| Don't know                                                                       | 3 | 33.3 | 1 | 7.7  | 0 | 0    | 1 | 11.1 | 0 | 0 | 0 | 0 |
| LM 5.6 Youth: Extent to which CSOs support labor market policies, interventions  |   |      |   |      |   |      |   |      |   |   |   |   |
| Don't know                                                                       | 2 | 22.2 | 1 | 7.7  | 0 | 0    | 0 | 0    | 0 | 0 | 0 | 0 |
| LM 5.7 Programming for Women: Extent to which CSOs support labor market policies |   |      |   |      |   |      |   |      |   |   |   |   |
| Don't know                                                                       | 2 | 22.2 | 1 | 7.7  | 0 | 0    | 0 | 0    | 0 | 0 | 0 | 0 |
| LM 5.8 Advocacy/Accountability: Extent to which CSOs support the training and ca |   |      |   |      |   |      |   |      |   |   |   |   |
| Don't know                                                                       | 2 | 22.2 | 1 | 7.7  | 0 | 0    | 1 | 11.1 | 0 | 0 | 0 | 0 |

**Note:**

- For readability purpose, complete wording for questions/variables has been provided as Appendix 1.
- Only the percentages of respondents who responded “don't know” to the respective question or sub-question was included in this table.
- Highlighted are values > 10%

|                                                                                  |   |      |   |     |   |     |   |      |   |   |   |      |
|----------------------------------------------------------------------------------|---|------|---|-----|---|-----|---|------|---|---|---|------|
| LM 5.9 CSO-Led Assessment and Monitoring: Extent to which CSOs assess, monitor a |   |      |   |     |   |     |   |      |   |   |   |      |
| Don't know                                                                       | 2 | 22.2 | 1 | 7.7 | 0 | 0   | 1 | 11.1 | 0 | 0 | 0 | 0    |
| LM 5.10 Forming Partnerships between CSOs: Extent to which the private sector ha |   |      |   |     |   |     |   |      |   |   |   |      |
| Don't know                                                                       | 2 | 22.2 | 1 | 7.7 | 0 | 0   | 1 | 11.1 | 0 | 0 | 0 | 0    |
| GEI 1.1 Democratic Values: Extent to which the government has ratified, domestic |   |      |   |     |   |     |   |      |   |   |   |      |
| Don't know                                                                       | 1 | 11.1 | 0 | 0   | 0 | 0   | 1 | 16.7 | 0 | 0 | 0 | 0    |
| GEI 1.2 Monitoring Democratic Values: Extent to which the government has created |   |      |   |     |   |     |   |      |   |   |   |      |
| Don't know                                                                       | 1 | 11.1 | 0 | 0   | 1 | 8.3 | 1 | 16.7 | 0 | 0 | 1 | 12.5 |
| GEI 1.3 Affirmation of Youth Democratic Participation: Extent to which the gover |   |      |   |     |   |     |   |      |   |   |   |      |
| Don't know                                                                       | 0 | 0    | 0 | 0   | 0 | 0   | 1 | 16.7 | 0 | 0 | 0 | 0    |
| GEI 1.4. Removing Legal Youth Barriers: Extent to which the government has prosc |   |      |   |     |   |     |   |      |   |   |   |      |
| Don't know                                                                       | 0 | 0    | 0 | 0   | 0 | 0   | 1 | 16.7 | 0 | 0 | 0 | 0    |
| GEI 1.5 Youth Policy: Extent to which the youth policy takes into account the la |   |      |   |     |   |     |   |      |   |   |   |      |
| Don't know                                                                       | 0 | 0    | 0 | 0   | 0 | 0   | 1 | 16.7 | 0 | 0 | 0 | 0    |
| GEI 1.6 Affirmation of Democratic Participation/Revision of Customary Law: Exten |   |      |   |     |   |     |   |      |   |   |   |      |
| Don't know                                                                       | 0 | 0    | 0 | 0   | 1 | 8.3 | 1 | 16.7 | 0 | 0 | 0 | 0    |
| GEI 1.7 Youth Policymaking Participation: Extent to which the government ensures |   |      |   |     |   |     |   |      |   |   |   |      |

**Note:**

- For readability purpose, complete wording for questions/variables has been provided as Appendix 1.
- Only the percentages of respondents who responded “don’t know” to the respective question or sub-question was included in this table.
- Highlighted are values > 10%

|                                                                                  |   |      |   |      |   |     |   |      |   |   |   |      |
|----------------------------------------------------------------------------------|---|------|---|------|---|-----|---|------|---|---|---|------|
| Don't know                                                                       | 0 | 0    | 1 | 16.7 | 1 | 8.3 | 1 | 16.7 | 0 | 0 | 0 | 0    |
| GEI 1.8 Rule of Law: Extent to which the rule of law is formally, legally establ |   |      |   |      |   |     |   |      |   |   |   |      |
| Don't know                                                                       | 1 | 11.1 | 0 | 0    | 1 | 8.3 | 1 | 16.7 | 0 | 0 | 0 | 0    |
| GEI 1.9 Transparency and Accountability: Extent to which national legislation ma |   |      |   |      |   |     |   |      |   |   |   |      |
| Don't know                                                                       | 0 | 0    | 0 | 0    | 0 | 0   | 1 | 16.7 | 0 | 0 | 0 | 0    |
| Don't know                                                                       | 0 | 0    | 0 | 0    | 1 | 8.3 | 1 | 16.7 | 0 | 0 | 0 | 0    |
| GEI 1.10 National Security: Extent to which the country/government is involved i |   |      |   |      |   |     |   |      |   |   |   |      |
| Don't know                                                                       | 1 | 11.1 | 1 | 16.7 | 0 | 0   | 1 | 16.7 | 0 | 0 | 2 | 25   |
| Don't know                                                                       | 0 | 0    | 0 | 0    | 0 | 0   | 1 | 16.7 | 0 | 0 | 2 | 25   |
| Don't know                                                                       | 1 | 11.1 | 0 | 0    | 0 | 0   | 1 | 16.7 | 0 | 0 | 3 | 37.5 |
| GEI 1.11 Rights: Extent to which the constitution affirms certain rights: freedo |   |      |   |      |   |     |   |      |   |   |   |      |
| Don't know                                                                       | 0 | 0    | 0 | 0    | 0 | 0   | 1 | 16.7 | 0 | 0 | 0 | 0    |
| GEI 1.12 Education and Democratic Values: Extent to which education policies, st |   |      |   |      |   |     |   |      |   |   |   |      |
| Don't know                                                                       | 0 | 0    | 0 | 0    | 0 | 0   | 1 | 16.7 | 0 | 0 | 0 | 0    |
| GEI 1.13 Affirmation of Safe Learning Environments: Extent to which education po |   |      |   |      |   |     |   |      |   |   |   |      |
| Don't know                                                                       | 0 | 0    | 0 | 0    | 0 | 0   | 1 | 16.7 | 0 | 0 | 0 | 0    |
| GEI 2.1 Strengthening Youth Activities/Institutions: Extent to which efforts are |   |      |   |      |   |     |   |      |   |   |   |      |
| Don't know                                                                       | 1 | 12.5 | 0 | 0    | 0 | 0   | 0 | 0    | 0 | 0 | 0 | 0    |

**Note:**

- For readability purpose, complete wording for questions/variables has been provided as Appendix 1.
- Only the percentages of respondents who responded “don’t know” to the respective question or sub-question was included in this table.
- Highlighted are values > 10%

|                                                                                  |   |      |   |    |   |     |   |   |   |   |   |      |
|----------------------------------------------------------------------------------|---|------|---|----|---|-----|---|---|---|---|---|------|
| GEI 2.2 Appointment of Youth Leader: Whether and to what extent there has been a |   |      |   |    |   |     |   |   |   |   |   |      |
| Don't know                                                                       | 1 | 12.5 | 0 | 0  | 0 | 0   | 0 | 0 | 0 | 0 | 1 | 12.5 |
| GEI 2.3 Youth Ideals and Aspirations: Extent to which programming is designed to |   |      |   |    |   |     |   |   |   |   |   |      |
| Don't know                                                                       | 1 | 12.5 | 0 | 0  | 0 | 0   | 0 | 0 | 0 | 0 | 0 | 0    |
| GEI 2.4 Youth Services: Extent to which programming is designed to address youth |   |      |   |    |   |     |   |   |   |   |   |      |
| Don't know                                                                       | 1 | 12.5 | 0 | 0  | 1 | 8.3 | 0 | 0 | 0 | 0 | 0 | 0    |
| GEI 2.5 Youth Involvement in National Initiatives: Extent to which there are eff |   |      |   |    |   |     |   |   |   |   |   |      |
| Don't know                                                                       | 1 | 12.5 | 0 | 0  | 1 | 8.3 | 0 | 0 | 0 | 0 | 0 | 0    |
| GEI 2.6 Personal Safety: Extent to which individual safety is provided for throu |   |      |   |    |   |     |   |   |   |   |   |      |
| GEI 2.7 Participation: Extent to which government functions involve the particip |   |      |   |    |   |     |   |   |   |   |   |      |
| GEI 2.8 Gender: Extent to which women participate in:                            |   |      |   |    |   |     |   |   |   |   |   |      |
| GEI 2.8.1                                                                        | 2 | 25   | 0 | 0  | 0 | 0   | 0 | 0 | 0 | 0 | 0 | 0    |
| GEI 2.8.2                                                                        | 0 | 0    | 1 | 20 | 0 | 0   | 0 | 0 | 0 | 0 | 0 | 0    |
| GEI 2.8.3                                                                        | 0 | 0    | 0 | 0  | 0 | 0   | 0 | 0 | 0 | 0 | 2 | 25   |
| GEI 2.9 Promotion of Equality: Extent to which gender equality in all aspects of |   |      |   |    |   |     |   |   |   |   |   |      |
| Don't know                                                                       | 0 | 0    | 0 | 0  | 1 | 8.3 | 0 | 0 | 0 | 0 | 0 | 0    |
| GEI 2.10 Sustainable Economic Opportunity:                                       |   |      |   |    |   |     |   |   |   |   |   |      |
| GEI 2.11 Human Development:                                                      |   |      |   |    |   |     |   |   |   |   |   |      |

**Note:**

- For readability purpose, complete wording for questions/variables has been provided as Appendix 1.
- Only the percentages of respondents who responded “don’t know” to the respective question or sub-question was included in this table.
- Highlighted are values > 10%

|                                                                                  |   |   |   |    |   |      |   |                |                |             |             |   |
|----------------------------------------------------------------------------------|---|---|---|----|---|------|---|----------------|----------------|-------------|-------------|---|
| GEI 2.11.1                                                                       | 0 | 0 | 0 | 0  | 1 | 8.3  | 0 | 0              | 0              | 0           | 0           | 0 |
| GEI 2.11.2                                                                       | 0 | 0 | 0 | 0  | 1 | 8.3  | 0 | 0              | 0              | 0           | 0           | 0 |
| GEI 2.11.3                                                                       | 0 | 0 | 0 | 0  | 1 | 8.3  | 0 | 0              | 0              | 0           | 0           | 0 |
| GEI 2.11.4                                                                       | 0 | 0 | 0 | 0  | 1 | 8.3  | 0 | 0              | 0              | 0           | 0           | 0 |
| GEI 3.1 Youth Empowerment: Extent to which youth empowerment has been enhanced,  |   |   |   |    |   |      |   |                |                |             |             |   |
| Don't know                                                                       | 0 | 0 | 0 | 0  | 1 | 9.1  | 0 | 0              | 0              | 0           | 0           | 0 |
| GEI 3.2 Government Advocacy: Extent to which members of the government advocates |   |   |   |    |   |      |   |                |                |             |             |   |
| Don't know                                                                       | 0 | 0 | 1 | 20 | 1 | 9.1  | 0 | 0              | 0              | 0           | 0           | 0 |
| GEI 3.3 Non-governmental Advocacy: Extent to which non-governmental actors advoc |   |   |   |    |   |      |   |                |                |             |             |   |
| Don't know                                                                       | 0 | 0 | 1 | 20 | 2 | 18.2 | 0 | 0              | 0              | 0           | 0           | 0 |
| GEI 3.4 Civil Society Organizations (CSOs): Extent to which CSOs specifically op |   |   |   |    |   |      |   |                |                |             |             |   |
| Don't know                                                                       | 0 | 0 | 0 | 0  | 1 | 9.1  | 0 | 0              | 0              | 0           | 0           | 0 |
| GEI 3.5 Advocacy Voice: Extent to which advocates have a voice in government dis |   |   |   |    |   |      |   | <b>Tanzani</b> | <b>Tanzani</b> | <b>Tota</b> | <b>Tota</b> |   |
| Don't know                                                                       | 0 | 0 | 0 | 0  | 1 | 9.1  | 0 | 0              | 0              | 1           | 2.7         |   |
| GEI 3.6 Voice of Instrumental Sectors of the DD: Extent to which the government  |   |   |   |    |   |      |   |                |                |             |             |   |
| GEI 3.6.1                                                                        | 0 | 0 | 0 | 0  | 1 | 9.1  | 0 | 0              | 0              | 0           | 0           | 0 |
| GEI 3.6.2                                                                        | 0 | 0 | 0 | 0  | 1 | 9.1  | 0 | 0              | 0              | 0           | 0           | 0 |
| GEI 3.6.3                                                                        | 0 | 0 | 0 | 0  | 1 | 9.1  | 0 | 0              | 0              | 0           | 0           | 0 |
| GEI 3.6.4                                                                        | 0 | 0 | 0 | 0  | 1 | 9.1  | 0 | 0              | 0              | 0           | 0           | 0 |

**Note:**

- For readability purpose, complete wording for questions/variables has been provided as Appendix 1.
- Only the percentages of respondents who responded “don’t know” to the respective question or sub-question was included in this table.
- Highlighted are values > 10%

|                                                                                              |   |      |   |    |   |      |   |   |   |   |   |      |
|----------------------------------------------------------------------------------------------|---|------|---|----|---|------|---|---|---|---|---|------|
| GEI 3.6.5                                                                                    | 0 | 0    | 0 | 0  | 2 | 18.2 | 0 | 0 | 0 | 0 | 0 | 0    |
| GEI 3.6.6                                                                                    | 0 | 0    | 0 | 0  | 1 | 9.1  | 0 | 0 | 0 | 0 | 0 | 0    |
| GEI 4.1 Strength of Observatory/Stakeholder/Technical Working Group for GEI: Ext             |   |      |   |    |   |      |   |   |   |   |   |      |
| GEI 4.1.1                                                                                    | 1 | 12.5 | 0 | 0  | 1 | 9.1  | 0 | 0 | 0 | 0 | 0 | 0    |
| GEI 4.1.2                                                                                    | 2 | 25   | 0 | 0  | 1 | 9.1  | 0 | 0 | 0 | 0 | 0 | 0    |
| GEI 4.1.3                                                                                    | 2 | 25   | 0 | 0  | 1 | 9.1  | 0 | 0 | 0 | 0 | 0 | 0    |
| GEI 4.2-+Education/Research Strategy: Extent to which national planning documents Don't know |   |      |   |    |   |      |   |   |   |   |   |      |
|                                                                                              | 0 | 0    | 0 | 0  | 2 | 18.2 | 0 | 0 | 0 | 0 | 1 | 14.3 |
| GEI 4.3 Governance, Financial and Development Data Gathering Partners:                       |   |      |   |    |   |      |   |   |   |   |   |      |
| GEI 4.3.1                                                                                    | 0 | 0    | 0 | 0  | 1 | 9.1  | 0 | 0 | 0 | 0 | 0 | 0    |
| GEI 4.3.2                                                                                    | 0 | 0    | 0 | 0  | 2 | 18.2 | 0 | 0 | 0 | 0 | 0 | 0    |
| GEI 4.3.3                                                                                    | 0 | 0    | 1 | 20 | 1 | 9.1  | 0 | 0 | 0 | 0 | 0 | 0    |
| GEI 4.4 Governance, Financial and Development Topical Data Gathering:                        |   |      |   |    |   |      |   |   |   |   |   |      |
| GEI 4.4.1                                                                                    | 1 | 12.5 | 0 | 0  | 1 | 9.1  | 0 | 0 | 0 | 0 | 0 | 0    |
| GEI 4.4.2                                                                                    | 0 | 0    | 0 | 0  | 1 | 9.1  | 0 | 0 | 0 | 0 | 2 | 28.6 |
| GEI 4.4.3                                                                                    | 0 | 0    | 0 | 0  | 2 | 18.2 | 0 | 0 | 0 | 0 | 0 | 0    |
| GEI 4.4.4                                                                                    | 0 | 0    | 0 | 0  | 1 | 9.1  | 0 | 0 | 0 | 0 | 0 | 0    |
| GEI 4.5 Quality/Coverage of Data:                                                            |   |      |   |    |   |      |   |   |   |   |   |      |
| GEI 4.5.1                                                                                    | 0 | 0    | 0 | 0  | 2 | 18.2 | 0 | 0 | 0 | 0 | 1 | 14.3 |
| GEI 4.5.2                                                                                    | 0 | 0    | 0 | 0  | 2 | 18.2 | 0 | 0 | 0 | 0 | 1 | 14.3 |

**Note:**

- For readability purpose, complete wording for questions/variables has been provided as Appendix 1.
- Only the percentages of respondents who responded “don’t know” to the respective question or sub-question was included in this table.
- Highlighted are values > 10%

|                                                                                    |   |      |   |   |   |      |   |      |   |      |   |      |
|------------------------------------------------------------------------------------|---|------|---|---|---|------|---|------|---|------|---|------|
| GEI 4.5.3                                                                          | 0 | 0    | 0 | 0 | 2 | 18.2 | 0 | 0    | 0 | 0    | 0 | 0    |
| GEI 4.5.4                                                                          | 0 | 0    | 0 | 0 | 2 | 18.2 | 0 | 0    | 2 | 28.6 | 4 | 10.8 |
| GEI 4.6 Quality Research Institutions: Extent to which the country has the capac   |   |      |   |   |   |      |   |      |   |      |   |      |
| Don't know                                                                         | 0 | 0    | 0 | 0 | 1 | 9.1  | 0 | 0    | 0 | 0    | 0 | 0    |
| GEI 4.7 Evaluation: Extent to which program statistics, surveys, and small studi   |   |      |   |   |   |      |   |      |   |      |   |      |
| Don't know                                                                         | 0 | 0    | 0 | 0 | 1 | 9.1  | 0 | 0    | 0 | 0    | 0 | 0    |
| GEI 4.8 Management, 's Use of Evaluation Findings: Extent to which local-level pro |   |      |   |   |   |      |   |      |   |      |   |      |
| Don't know                                                                         | 0 | 0    | 0 | 0 | 1 | 9.1  | 0 | 0    | 0 | 0    | 0 | 0    |
| GEI 4.10 Dissemination of Information to Other Implementing Bodies: Extent to wh   |   |      |   |   |   |      |   |      |   |      |   |      |
| Don't know                                                                         | 0 | 0    | 0 | 0 | 1 | 9.1  | 0 | 0    | 0 | 0    | 0 | 0    |
| GEI 5.1 CSO Actor Power: Extent to which CSO actors are in strong positions to p   |   |      |   |   |   |      |   |      |   |      |   |      |
| Don't know                                                                         | 0 | 0    | 0 | 0 | 1 | 9.1  | 1 | 16.7 | 0 | 0    | 0 | 0    |
| GEI 5.2 Budget Analysis as a CSO Tool: Extent to which CSOs utilize budget analy   |   |      |   |   |   |      |   |      |   |      |   |      |
| Don't know                                                                         | 3 | 42.9 | 0 | 0 | 1 | 9.1  | 1 | 16.7 | 0 | 0    | 0 | 0    |
| GEI 5.3 Community-Based Service Delivery Support: Extent to which CSOs participa   |   |      |   |   |   |      |   |      |   |      |   |      |
| Don't know                                                                         | 0 | 0    | 0 | 0 | 1 | 9.1  | 1 | 16.7 | 0 | 0    | 0 | 0    |
| GEI 5.4 Human Rights and Quality of Implementation: Extent to which CSOs advocat   |   |      |   |   |   |      |   |      |   |      |   |      |
| Don't know                                                                         | 1 | 14.3 | 0 | 0 | 1 | 9.1  | 1 | 16.7 | 0 | 0    | 0 | 0    |

**Note:**

- For readability purpose, complete wording for questions/variables has been provided as Appendix 1.
- Only the percentages of respondents who responded "don't know" to the respective question or sub-question was included in this table.
- Highlighted are values > 10%



|                                                                                  |   |      |   |   |   |      |   |      |   |   |   |   |
|----------------------------------------------------------------------------------|---|------|---|---|---|------|---|------|---|---|---|---|
| GEI 5.5 Youth: Extent to which CSOs support youth to participate in education, t |   |      |   |   |   |      |   |      |   |   |   |   |
| Don't know                                                                       | 1 | 14.3 | 0 | 0 | 1 | 9.1  | 1 | 16.7 | 0 | 0 | 0 | 0 |
| GEI 5.6 Programs for Women: Extent to which CSOs ensure GEI policies support wom |   |      |   |   |   |      |   |      |   |   |   |   |
| Don't know                                                                       | 0 | 0    | 0 | 0 | 1 | 9.1  | 1 | 16.7 | 0 | 0 | 0 | 0 |
| GEI 5.7 Advocacy/Accountability                                                  |   |      |   |   |   |      |   |      |   |   |   |   |
| Don't know                                                                       | 0 | 0    | 0 | 0 | 2 | 18.2 | 1 | 16.7 | 0 | 0 | 0 | 0 |
| Don't know                                                                       | 0 | 0    | 0 | 0 | 2 | 18.2 | 1 | 16.7 | 0 | 0 | 0 | 0 |
| GEI 5.8 CSO-Led Assessment and Monitoring: Extent to which CSOs assess, monitor  |   |      |   |   |   |      |   |      |   |   |   |   |
| Don't know                                                                       | 0 | 0    | 0 | 0 | 1 | 9.1  | 1 | 16.7 | 0 | 0 | 0 | 0 |
| GEI 5.9 Forming Partnerships between CSOs: Extent to which CSOs have formed nati |   |      |   |   |   |      |   |      |   |   |   |   |
| Don't know                                                                       | 0 | 0    | 0 | 0 | 1 | 9.1  | 1 | 16.7 | 0 | 0 | 0 | 0 |

**Note:**

- For readability purpose, complete wording for questions/variables has been provided as Appendix 1.
- Only the percentages of respondents who responded “don’t know” to the respective question or sub-question was included in this table.
- Highlighted are values > 10%
